# Investigation of the *Staphylococcus aureus* GraSR Regulon Reveals Novel Links to Virulence, Stress Response and Cell Wall Signal Transduction Pathways

Mélanie Falord<sup>1,2</sup>, Ulrike Mäder<sup>3</sup>, Aurélia Hiron<sup>1,2</sup>, Michel Débarbouillé<sup>1,2</sup>, Tarek Msadek<sup>1,2\*</sup>

**1** Institut Pasteur, Biology of Gram-Positive Pathogens, Department of Microbiology, Paris, France, **2** CNRS, URA 2172, Paris, France, **3** Interfaculty Institute for Genetics and Functional Genomics, Department for Functional Genomics, Ernst Moritz Arndt University, Greifswald, Germany

## Abstract

The GraS/GraR two-component system has been shown to control cationic antimicrobial peptide (CAMP) resistance in the major human pathogen *Staphylococcus aureus*. We demonstrated that *graX*, also involved in CAMP resistance and cotranscribed with *graRS*, encodes a regulatory cofactor of the GraSR signaling pathway, effectively constituting a three-component system. We identified a highly conserved ten base pair palindromic sequence (5' ACAA TTTGT 3') located upstream from GraR-regulated genes (*mprF* and the *dlt* and *vraFG* operons), which we show to be essential for transcriptional regulation by GraR and induction in response to CAMPs, suggesting it is the likely GraR binding site. Genome-based predictions and transcriptome analysis revealed several novel GraR target genes. We also found that the GraSR TCS is required for growth of *S. aureus* at high temperatures and resistance to oxidative stress. The GraSR system has previously been shown to play a role in *S. aureus* pathogenesis and we have uncovered previously unsuspected links with the AgrCA peptide quorum-sensing system controlling virulence gene expression. We also show that the GraSR TCS controls stress response and cell wall metabolism signal transduction pathways, sharing an extensive overlap with the WalKR regulon. This is the first report showing a role for the GraSR TCS in high temperature and oxidative stress survival and linking this system to stress response, cell wall and pathogenesis control pathways.

**Citation:** Falord M, Mäder U, Hiron A, Débarbouillé M, Msadek T (2011) Investigation of the *Staphylococcus aureus* GraSR Regulon Reveals Novel Links to Virulence, Stress Response and Cell Wall Signal Transduction Pathways. PLoS ONE 6(7): e21323. doi:10.1371/journal.pone.0021323

**Editor:** Malcolm James Horsburgh, University of Liverpool, United Kingdom

**Received:** May 4, 2011; **Accepted:** May 25, 2011; **Published:** July 1, 2011

**Copyright:** © 2011 Falord et al. This is an open-access article distributed under the terms of the Creative Commons Attribution License, which permits unrestricted use, distribution, and reproduction in any medium, provided the original author and source are credited.

**Funding:** This work was supported by research funds from the European Commission (StaphDynamics [LHSM-CT-2006-019064] and BaSysBio [LSHG-CT-2006-037469] grants), the Centre National de la Recherche Scientifique (CNRS URA 2172), Agence Nationale de la Recherche (ANR Grabron and NaBab), and the Institut Pasteur (PTR N°256 and PTR N°336). Mélanie Falord received a Young Scientist Fellowship from the Conseil Pasteur-Weizmann. The funders had no role in study design, data collection and analysis, decision to publish, or preparation of the manuscript.

**Competing Interests:** The authors have declared that no competing interests exist.

\* E-mail: tmsadek@pasteur.fr

## Introduction

The opportunistic pathogen *Staphylococcus aureus* is both a commensal and a major Gram-positive pathogen, causing a variety of infections ranging from superficial skin abscesses to more serious diseases such as pneumonia, meningitis, endocarditis, septicemia and toxic shock syndrome [1]. The ubiquitous nature of this pathogen stems mostly from its capacity to survive a large variety of environmental conditions as well as an impressive ability to resist host innate immune defense mechanisms and produce systemic infections, often in healthy humans [2,3]. This unique adaptive potential has made *S. aureus* one of the major causes of nosocomial infections today, compounded by the rapid emergence of multiple antibiotic-resistant strains over the past few decades [4], particularly methicillin and vancomycin-intermediate resistant strains (MRSA and VISA). Until recently, vancomycin had remained the weapon of last resort, but the recent appearance of the enterococcal *vanA* vancomycin-resistance gene cluster in *S. aureus* highlights the growing threat this bacterium poses to human health and the urgent need for developing novel therapeutic approaches [5,6].

Cationic antimicrobial peptides (CAMPs) are an important component of host innate immunity and understanding the molecular mechanisms involved in resistance is a key factor in

staphylococcal treatment research. CAMPs have both cationic and amphipathic properties and are classified according to their length and secondary structure [7]. They are produced by certain immune, skin and epithelial cells in all living kingdoms, as defenses against microbial proliferation, and many are known to act by forming pores in the cell membrane, through interactions with bacterial cell envelope components [8]. However, recent work has shown that several CAMPs, including indolicidin and colistin, can also kill by inhibiting intracellular processes such as protein and DNA synthesis as well as septum formation and division [9].

To counteract CAMP antimicrobial activity during infection, Gram-positive bacteria have developed several resistance mechanisms, including degradation, sequestration or electrostatic repulsion [10]. In *Bacillus subtilis* and related Gram-positive bacteria, D-alanylation of wall teichoic acids (WTAs) and lipoteichoic acids (LTAs), mediated by the DltABCD enzymes, as well as MprF-dependent lysis of phosphatidylglycerol, prevent CAMP-binding by increasing the bacterial surface positive charge [10,11].

Two-component systems (TCSs) play an important role in these mechanisms by coordinating the expression of resistance genes, when CAMPs are detected at the cell surface. TCSs are typically composed of a membrane histidine kinase (HK), acting as a signal sensor/transducer, through phosphorylation of its cognate response

regulator (RR), which acts as a transcription activator or repressor. Most *S. aureus* genomes have a sophisticated arsenal of sixteen sets of environmental monitoring TCS genes, with an additional one present in the staphylococcal cassette chromosome *mec* element of MRSA strains [12]. Among these systems, the well-studied AgrCA peptide quorum-sensing TCS controls the expression of several virulence genes [13] and VraSR was shown to be responsible for resistance to cell wall-damaging compounds, including  $\beta$ -lactam antibiotics and some CAMPs [14].

The main regulatory pathway controlling CAMP resistance in staphylococci, however, is the GraSR (Glycopeptide Resistance Associated) TCS, aka ApsSR (Antimicrobial Peptide Sensor), which has been extensively studied over the past five years [15–18]. First discovered in *S. aureus* as a locus whose overexpression led to increased vancomycin resistance, the GraSR TCS was shown to be required for resistance of *S. aureus* and *S. epidermidis* to several CAMPs, by controlling expression of *mprF* and the *dlt* and *vraFG* operons [15–19]. Additionally, the first gene of the *graRS* operon encodes GraX, a protein of unknown function that also plays a role in CAMP resistance [16–19]. Missense mutations in the *graRS* locus have been linked to CAMP sensitivity of certain *S. aureus* strains [20], and the system also plays a role in biofilm formation [21,22]. GraS was shown to play a role in survival of *S. epidermidis* and *S. aureus* within neutrophils [23] and the GraSR system has been implicated in *S. aureus* virulence in several experimental models [18,24–26].

In this study we set out to further define the GraSR regulon in *S. aureus*. We identified a highly conserved palindromic sequence as the likely GraR binding site, and showed that the GraSR TCS is required for growth of *S. aureus* at high temperature and resistance to oxidative stress. Using a combination of genome-based predictions and transcriptome analysis, we revealed several novel GraR target genes as well as unsuspected links with the AgrCA and WalKR TCSs.

## Results

### GraX, GraS and GraR are required for *Staphylococcus aureus* colistin resistance

In an effort to fully define the GraSR regulon of *Staphylococcus aureus*, and determine the roles of GraXSR in colistin resistance, we constructed mutant strains ST1036 ( $\Delta$ *graRS*) and ST1070 ( $\Delta$ *graX*) in the *S. aureus* HG001 background [27] by removing the entire coding sequences of the genes ( $\Delta$ *graRS*), or by an in-frame deletion ( $\Delta$ *graX*; see Materials and Methods). GraX, predicted to be a cytoplasmic protein, presents weak similarities to sugar epimerases, and has been shown to be involved in CAMP resistance along with the GraSR TCS, but its specific role remains to be established.

Minimal inhibitory concentration (MIC) values for resistance to colistin, a bacterial CAMP, were determined by following growth in TSB at 37°C over a 12 h period, using a Biotek Synergy Microplate reader, with decreasing concentrations of colistin (Table 1). The  $\Delta$ *graRS* and  $\Delta$ *graX* mutants displayed acute sensitivity to colistin compared to the parental strain. However, the  $\Delta$ *graX* mutant appeared to be more resistant to colistin than the  $\Delta$ *graRS* mutant. We therefore analyzed *graR* expression in the  $\Delta$ *graX* mutant by quantitative RT-PCR (qRT-PCR), showing that *graR* expression is increased approximately 2-fold compared to the parental strain (data not shown). This is likely through stabilization of the *graRS* transcript due to increased proximity with the operon promoter in the  $\Delta$ *graX* mutant, suggesting that CAMP sensitivity of the  $\Delta$ *graX* mutant may in fact be underestimated. We also

**Table 1.** GraX, GraS and GraR are required for colistin resistance.

| Strain | Relevant genotype                            | Colistin MIC ( $\mu$ g ml <sup>-1</sup> ) |
|--------|----------------------------------------------|-------------------------------------------|
| ST1120 | HG001 pMK4-Pprot                             | 700                                       |
| ST1117 | $\Delta$ <i>graRS</i> pMK4-Pprot             | 100                                       |
| ST1116 | $\Delta$ <i>graRS</i> pMK4-Pprot <i>graR</i> | 700                                       |
| ST1070 | $\Delta$ <i>graX</i>                         | 300                                       |

Strains were grown at 37°C in TSB with decreasing colistin concentrations. Growth was followed by measuring absorbance at 600 nm using a microtiter plate reader and MICs were determined as the colistin concentration inhibiting strain growth after 12 h. Each experiment was repeated at least three times. doi:10.1371/journal.pone.0021323.t001

observed that the  $\Delta$ *graRS* and  $\Delta$ *graX* mutants were highly sensitive to nisin (data not shown) as previously observed [17,18].

In order to complement the  $\Delta$ *graRS* mutant, an intact copy of the *graR* gene was introduced on a multicopy plasmid, resulting in strain ST1116 ( $\Delta$ *graRS* pMK4-Pprot-*graR*). Complementation of the  $\Delta$ *graRS* mutant by constitutive expression of the *graR* gene fully restored colistin resistance (Table 1). Indeed, it is well known that response regulator overexpression can complement the absence of the cognate kinase, due to its phosphorylation by other phosphate donors such as acetyl phosphate or aspecific kinase activity within the cell [28,29].

### GraXSR do not autoregulate their own synthesis

As shown in Fig. 1A, the *graXRS* operon is located directly upstream from the *vraFG* operon, encoding an ABC transporter [19]. To define the *graXRS* operon promoter region, we first analyzed its expression using primer extension experiments. Total RNA was extracted from strain HG001 during mid-exponential growth in TSB at 37°C and used for primer extension experiments. We identified a unique transcriptional start site in the *graXRS* promoter region (Fig. 1B), and the preceding nucleotide sequence revealed appropriately spaced potential –10 and –35 regions, sharing strong similarities with the consensus sequences of promoters recognized by the vegetative form of RNA polymerase holoenzyme, E $\sigma^A$  (Fig. 1C).

Several two-component systems are known to positively autoregulate their own synthesis, such as the VraSR cell envelope stress response and AgrCA peptide quorum-sensing virulence regulatory systems of *S. aureus* [13,30]. In order to test whether this was also the case for the GraSR system, a transcriptional fusion was constructed between the *graXRS* operon upstream region and the *lacZ* gene of *E. coli* using the pSA14 plasmid (see Materials and Methods). To study *graXRS* operon expression, the *graX-lacZ* fusion was introduced into strains HG001, ST1036 ( $\Delta$ *graRS*) and ST1070 ( $\Delta$ *graX*), and  $\beta$ -galactosidase activity was measured during mid-exponential growth at 37°C in TSB after a 30 mn treatment with or without 200  $\mu$ g ml<sup>-1</sup> colistin (Fig. 2). No significant differences in *graX-lacZ* expression levels were observed between the three strains, or in the presence or absence of colistin, indicating that GraXSR do not autoregulate their own synthesis, and that their cellular levels are not induced by the presence of CAMPs such as colistin.

### Identification of potential GraR-binding sites in the promoters of known GraR regulated genes

Although several genes involved in CAMP resistance are known to be controlled by GraSR (*mprF*, *dlt* and *vraFG* operons), the

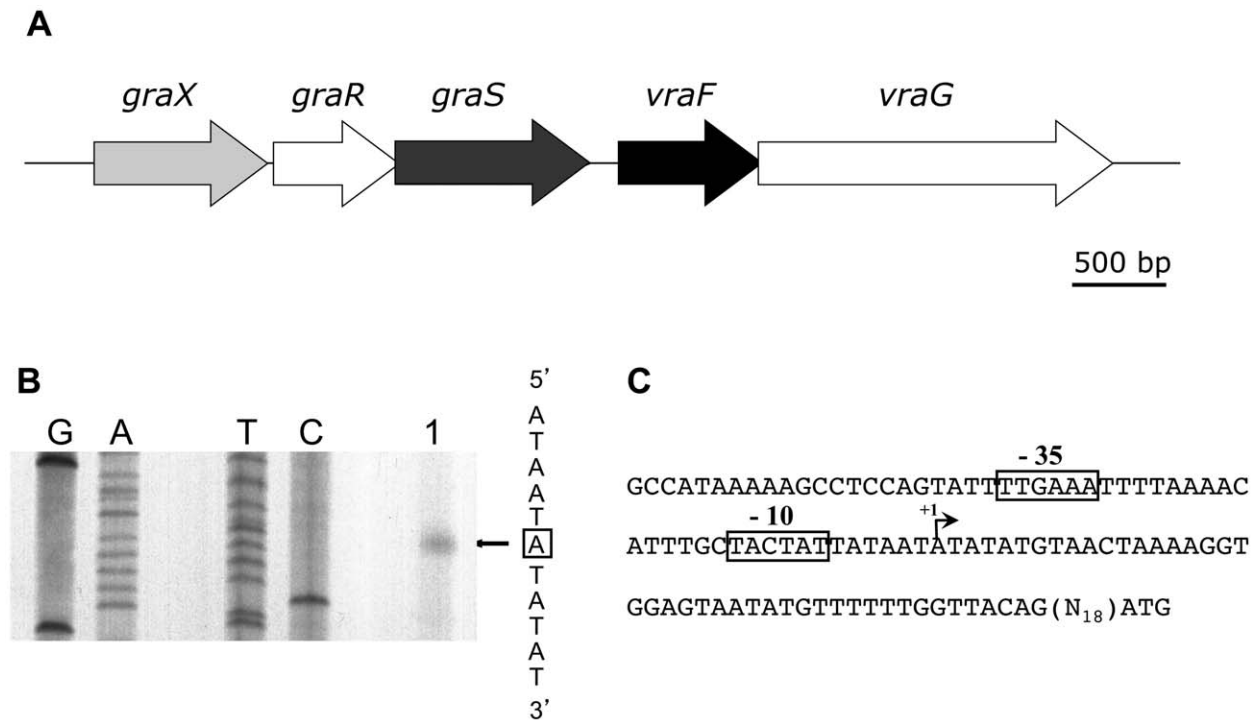

**Figure 1. The *graXRS* operon is transcribed from a  $\sigma^A$  promoter.** (A) The *graXRS/vraFG* locus of *S. aureus* HG001. (B) Primer extension analysis of *graXRS* mRNA was carried out using total RNA extracted from *S. aureus* strain HG001 during mid-exponential growth in TSB at 37°C. Primer extension experiments were performed using the *graX*-specific oligonucleotide MF63 (lane 1). The corresponding Sanger dideoxy chain termination sequencing reactions (GATC) were carried out on a PCR-generated DNA fragment corresponding to the *graX* upstream region (MF62/MF63). The transcriptional start site is boxed. (C) Nucleotide sequence of the *graXRS* operon upstream region. Potential  $\sigma^A$ -type -35 and -10 sequences are boxed and the transcriptional start site is labeled +1. doi:10.1371/journal.pone.0021323.g001

specific nucleotide sequence constituting the GraR operator sequence remains unknown. In order to identify potential GraR-binding sites upstream from the coding regions of these genes, we first identified their transcription initiation sites through primer extension analysis. Total RNA was extracted from strain HG001 during mid-exponential growth in TSB at 37°C after treatment

with 200  $\mu\text{g ml}^{-1}$  colistin and used for primer extension experiments. We identified a unique transcriptional start site in the *mprF* and *vraFG* promoter regions (Fig. 3A) and two initiation sites for the *dltXABCD* operon. The first (not shown here), is located 30 bp upstream from the *dltX* (SAOUHSC\_00868) translation initiation codon, and was previously identified in *S.*

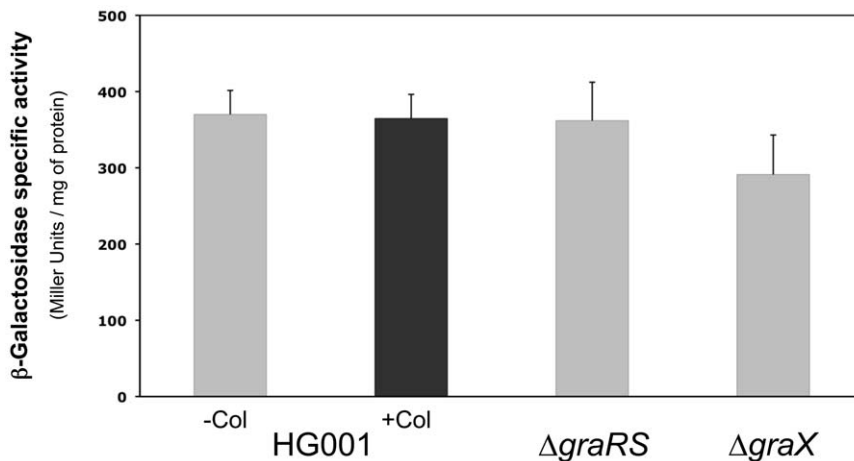

**Figure 2. GraSR do not control their own synthesis.** Expression of the *graXRS* operon was followed using a *graX'-lacZ* transcriptional fusion in *S. aureus* strains HG001, ST1036 ( $\Delta graRS$ ) and ST1070 ( $\Delta graX$ ).  $\beta$ -Galactosidase assays were performed as described in Materials and Methods and measured during mid-exponential growth at 37°C in TSB (grey bars) or after treatment with 200  $\mu\text{g ml}^{-1}$  colistin for the HG001 strain (black bar). Means and standard deviations values are presented from at least three independent experiments. doi:10.1371/journal.pone.0021323.g002

*aureus* SA113 [31] whereas the second (Fig. 3A), 110 bp further upstream, had not been reported. We identified appropriately spaced potential  $-10$  and  $-35$  regions upstream from all three transcription initiation sites (Fig. 3B). The *mprF* and *dltXABCD*  $-10$  regions share strong similarities with the consensus sequence recognized by the vegetative form of RNA polymerase holoenzyme,  $E\sigma^A$ . However, all three  $-35$  regions as well as the  $-10$  region of the *vraFG* operon showed only weak similarities with RNA polymerase  $E\sigma^A$  consensus promoter sequences, consistent with the existence of a positive transcriptional regulator [32].

GraR is a member of the OmpR subfamily of response regulators, with a typical winged helix-turn-helix domain [33] extending from residues 173 to 203. Although response regulators belonging to the OmpR family are known to bind to short direct repeats [34], orthologs of GraR such as VirR of *Listeria monocytogenes* and BceR of *Bacillus subtilis* were in fact shown to bind to inverted repeat sequences [35,36]. We failed to identify any significant direct repeat sequences in the upstream regions of *mprF* and the *vraFG* and *dlt* operons. However, a global study aimed at identifying response regulator binding sites in low G+C Gram-positive bacteria [37] reported the presence of an imperfect palindromic sequence (5' AAGTGACA-N4-TGTCATTT 3') within the end of the *graS* coding region, upstream from the *vraFG* operon which is known to be controlled by the GraSR system [16,17,18,19]. We were able to identify this palindromic sequence as also being present upstream from the  $-35$  sequences of *mprF* and the upstream *dlt* operon promoter. The three inverted repeats are highly conserved, allowing us to align them in order to produce a potential GraR-binding site consensus sequence (Fig. 3B). In agreement with our results showing that GraXSR do not autoregulate their own synthesis, the potential GraR operator sequence is not present in the *graXRS* operon upstream promoter region.

### GraSR-dependent gene expression requires GraX, CAMPs and the consensus binding site

To determine the roles of GraX and this potential GraR-binding site in CAMP resistance, we constructed transcriptional *lacZ* fusions with the *vraFG* operon and *mprF* gene promoters, using the pSA14 vector, with or without the potential GraR operator sequence (*vraF-lacZ* and  $\Delta\Delta$ *vraF-lacZ* or *mprF-lacZ* and  $\Delta\Delta$ *mprF-lacZ*, respectively). The fusions were introduced into strains HG001, ST1036 ( $\Delta$ *graRS*) and ST1070 ( $\Delta$ *graX*) and  $\beta$ -galactosidase activity was measured during mid-exponential growth at 37°C in TSB with or without a 30 mn treatment with 50  $\mu\text{g ml}^{-1}$  colistin (Fig. 4A). In the absence of GraX, GraSR or the potential GraR-binding site (strains ST1052  $\Delta$ *graX vraF-lacZ*; ST1041  $\Delta$ *graRS vraF-lacZ*; and ST1040  $\Delta\Delta$ *vraF-lacZ*), expression of *vraF-lacZ* was strongly lowered, even in the presence of colistin (Fig. 4A). Comparable results were observed using the *mprF-lacZ* and  $\Delta\Delta$ *mprF-lacZ* fusions, although *mprF* clearly displays a higher basal level of expression in the absence of GraSR and GraX (Fig. 4B). We also note that there is a significant level of GraSR-dependent expression from both the *vraF* and *mprF* promoters in the absence of colistin, indicating that the GraSR system is at least partially active in the absence of inducer, or that it is responding to some other signal under these conditions.

As a control, we introduced a transcriptional fusion with the constitutively expressed promoter of the TU elongation factor *tufA* gene into *S. aureus* strain HG001, and no difference in *tufA-lacZ* expression was observed after a 30 mn treatment with or without 200  $\mu\text{g ml}^{-1}$  colistin (see Supplementary Material Fig. S1A). In order to rule out a potential colistin effect independent of its function as a CAMP, we measured  $\beta$ -galactosidase activities of the two fusions (*vraF-lacZ* and *mprF-lacZ*) in strain HG001 following 30 mn incubation in the presence or absence of 5  $\mu\text{g ml}^{-1}$

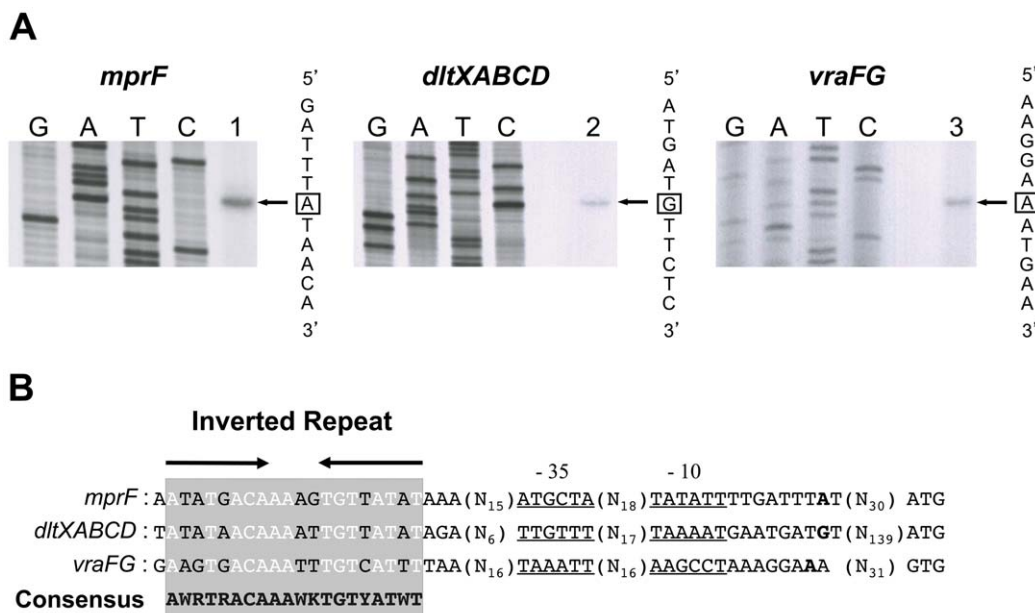

**Figure 3. Identification of potential GraR-binding sites in the promoters of known GraR-regulated genes.** (A) Primer extension analysis of *mprF*, *dltXABCD* and *vraFG* transcripts was carried out using total RNA extracted from *S. aureus* strain HG001 treated with 200  $\mu\text{g ml}^{-1}$  colistin during mid-exponential growth at 37°C in TSB, using specific oligonucleotides for *mprF*, *dltX* and *vraF* (lanes 1 to 3 respectively). The corresponding Sanger dideoxy chain termination sequencing reactions (GATC) were carried out on PCR-generated DNA fragments corresponding to the respective upstream regions (see Table 5). The transcriptional start sites are boxed. (B) Alignment of the potential GraR DNA-binding sites in the *mprF*, *dltXABCD* and *vraFG* promoter regions. The potential GraR-binding site is shaded and conserved nucleotides are shown in white. Potential  $-35$  and  $-10$  sequences are underlined and the transcriptional start sites are indicated in bold. doi:10.1371/journal.pone.0021323.g003

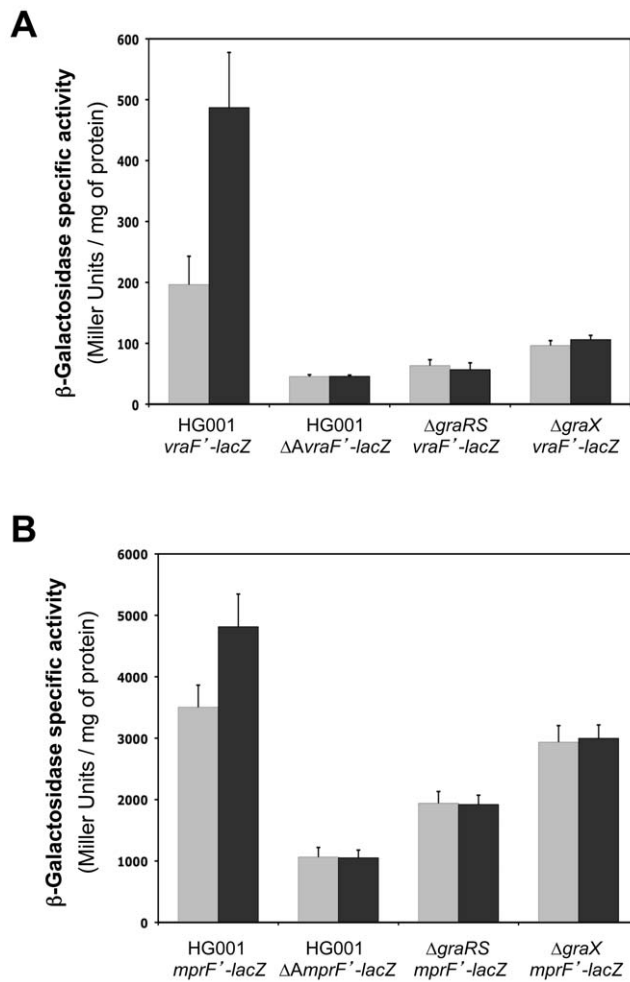

**Figure 4. GraSR-dependent gene expression requires GraX, colistin and the consensus binding site.** *vraFG* (A) and *mprF* (B) expression was followed using transcriptional *lacZ* fusions, with or without the upstream GraR operator sequence (*vraF*'-lacZ, *mprF*'-lacZ and  $\Delta$ *AvraF*'-lacZ,  $\Delta$ *AmprF*'-lacZ, respectively). The fusions were introduced in *S. aureus* strains HG001, ST1036 ( $\Delta$ *graRS*) and ST1070 ( $\Delta$ *graX*). Expression was measured during mid-exponential growth in TSB at 37°C (grey bars) or after treatment with 50  $\mu$ g ml<sup>-1</sup> colistin (black bars).  $\beta$ -Galactosidase assays were performed as described in Materials and Methods. Means and standard deviation values are presented from three independent experiments. doi:10.1371/journal.pone.0021323.g004

indolicidin and found increased expression for both fusions upon addition of indolicidin (see Supplementary Material Fig. S1B).

To further investigate the role of the GraR-binding site we have shown to be required for GraR-dependent regulation, we constructed two fusions of the same length between the *vraFG* operon promoter sequence and the *lacZ* gene in the pSA14 vector. The two fusions only extend nineteen base pairs upstream from the potential GraR binding site, and differ by the introduction of seven point mutations in the inverted repeat operator sequence by site-directed mutagenesis through PCR, effectively destroying the palindromic sequence (Fig. 5A). The native and mutated promoter fusions (*vraF2*'-lacZ and *vraF2\**'-lacZ respectively) were introduced into strain HG001 and  $\beta$ -galactosidase activity was measured during mid-exponential growth at 37°C in TSB with or without a 30 min treatment with 200  $\mu$ g ml<sup>-1</sup> colistin (Fig. 5B). Expression of *vraF2*'-lacZ was induced by colistin (Fig. 5B, strain ST1168),

whereas in strain ST1169 (HG001 *vraF2\**'-lacZ) the mutations destroying the inverted repeat strongly diminished *vraF2*'-lacZ expression and induction by colistin was lost, leaving only a low basal level of expression similar to that measured in the absence of GraR or its binding site (Fig. 4A).

Taken together, these results show that GraSR, GraX and the inverted repeat sequence are all required for the expression of GraR-regulated genes and their induction in response to CAMPs, strongly suggesting that this sequence constitutes the GraR operator sequence. Although the exact function of GraX in this regulatory pathway remains to be elucidated, we show here that it acts as a cofactor of GraSR-dependent transcription activation.

### Genome-based prediction of the GraSR regulon

We then used the sequence of the identified likely GraR binding site to search for new potential GraSR-regulated genes in *S. aureus*. For this purpose, we used the restricted consensus 5'-ACAAAWKTGT-3' to scan the *S. aureus* NCTC 8325 genome using the SearchPattern function of the ARTEMIS software [38]. To select GraSR-regulated candidate genes, we excluded inverted repeats lying more than 500 pb upstream from the annotated translational initiation site of each gene. We identified potential GraR-binding sites on either strand upstream from 29 genes or operons (Table 2). Among these, 13 had already been described in *S. aureus* and another 10 genes encode putative proteins whose potential function can be deduced from sequence similarities and are suggested to be involved in different cellular pathways, whereas the remaining genes are of unknown function (Table 2).

Interestingly, 15 genetic loci encode proteins that can be classified in major functional groups. The first includes known and putative antimicrobial resistance-associated proteins: MprF, DltABCD, VraFG, and a  $\beta$ -lactam antibiotic modifying enzyme named PnbA [39]. The second group corresponds to transport proteins: the oligopeptide ATP-binding transporter OppF, a putative glucaric acid transporter (SAOUHSC\_02815) and two genes located directly downstream from the *vraFG* operon, encoding a putative inorganic phosphate transporter (SAOUHSC\_00669 and SAOUHSC\_00670) known as PitAB in *E. coli* [40]. In the third group, involved in cell envelope modification, we found the *tarM* operon involved in teichoic acid glycosylation [41] and genes encoding the cell wall amidase SsaA, a probable autolysin regulator (AtR-like), and the SpsB signal peptidase. The fourth class of potentially GraR-regulated genes is linked to oxidation-reduction processes, including the *goxABCD* quinol oxidase operon, *ald*, an alanine dehydrogenase gene, and genes encoding the Yrke-like protein containing multi-redox domains and the YtbE-like protein probably involved in 2,5-didehydrogluconate reduction.

Given the functional coherence of the identified loci, we investigated the relevance of this newly defined GraSR regulon by alignment of the 29 identified potential GraR-binding sites using the WebLogo website (<http://weblogo.berkeley.edu/>), generating a perfect 10 bp inverted repeat consensus sequence with a high degree of conservation, constituting the likely GraR operator: 5'ACAAA TTTGT 3' (Fig. 6).

### Expression profiling of the GraSR regulon

Having defined a consensus GraR operator sequence and several new potential members of the GraSR regulon, we wished to validate these predictions *in vivo*. Using the BaSysBio Sau T1 chip, a NimbleGen 385K feature tiling array designed to cover both strands of the entire *Staphylococcus aureus* NCTC 8325 genome (see Materials and Methods), we examined global expression changes between the parental HG001 strain and the  $\Delta$ *graRS* mutant (ST1036), grown to mid-exponential phase in TSB with

A

*vraF2'*-*lacZ* : (N<sub>16</sub>) GAAGTGACAAATTTGTCATTTTAA (N<sub>16</sub>) TAAATT (N<sub>16</sub>) AAGCCTAAAGGAAATG (N<sub>8</sub>)

*vraF2\**-*lacZ* : (N<sub>16</sub>) GAACTTTCAACTTGTAACTTTTAA (N<sub>16</sub>) TAAATT (N<sub>16</sub>) AAGCCTAAAGGAAATG (N<sub>8</sub>)

B

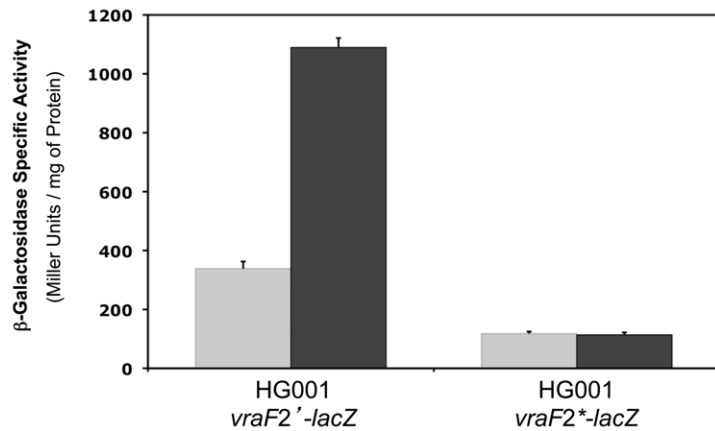

**Figure 5. Point mutations in the GraR-binding site prevent *vraFG* expression and colistin induction.** (A) Alignment of the DNA sequences used to construct the *vraF2'*-*lacZ* and *vraF2\**-*lacZ* fusions. Potential  $-35$  and  $-10$  sequences are underlined, the identified transcriptional start site is indicated in bold and the GraR-binding site is shaded. Point mutations introduced in the *vraF2\**-*lacZ* fusion are shown in white. (B) *vraF2'*-*lacZ* and *vraF2\**-*lacZ* fusion expression was measured in *S. aureus* HG001 (strains ST1168 and ST1169, respectively) during mid-exponential growth at 37°C in TSB (grey bars) or after treatment with 200  $\mu\text{g ml}^{-1}$  colistin (black bars).  $\beta$ -Galactosidase assays were performed as described in Materials and Methods. Means and standard deviations values are presented from three independent experiments. doi:10.1371/journal.pone.0021323.g005

50  $\mu\text{g ml}^{-1}$  colistin. A total of 424 genes were found to be significantly differentially expressed in the  $\Delta\text{graRS}$  mutant compared with the parental strain, with a  $\geq 1.8$ -fold change in transcriptional levels and a P-value (Z-test)  $\leq 3.5 \times 10^{-4}$ . Among these, 235 were positively controlled by GraSR and 189 were repressed (Table S1 and Table S2, respectively). Interestingly, among the positively controlled genes, the most highly regulated encode major virulence factors or regulators, while the remaining genes belonged to the principal categories uncovered by our *in silico* predictions (see Table 2; antimicrobial resistance, transport, cell envelope modification, oxidoreduction processes) as well as stress response genes, and multiple regulatory and metabolic pathways (acetate, purine and pyrimidine, pyridoxal, xanthine) (Tables S1 and S2). We chose to focus our attention on positively controlled genes involved in the classes uncovered by our *in silico* analysis, as well as virulence, regulation and stress response which are listed in Table 3.

The most strongly regulated genes encode haemolysins, the AgrBDCA peptide quorum-sensing signal transduction pathway, members of the Sar family of virulence regulators, several host interaction proteins and virulence factors, (fibrinogen binding protein, ClfB, CHIPS, haemolysins, Sbi, SdrH), autolysins, as well as quinol oxidases (Table 3). This is the first report linking GraSR and the AgrCA major *S. aureus* virulence regulatory system.

Among the regulatory genes, we note those encoding the LytSR TCS, involved in autolysis and biofilm formation [42,43]. Most of the genes involved in cell envelope modification encode autolysins, including the AtlA major bifunctional autolysin, the SceD and IsaA transglycosylases, as well as seven genes encoding potential amidases with CHAP domains (Cysteine, Histidine-dependent

Amidohydrolases/Peptidases), such as Sle1 or SsaA (Table 3). Interestingly, eight of the GraSR-dependent autolysin genes also belong to the WalkR regulon [44,45] (indicated by an asterisk in Table 3) suggesting a significant regulatory overlap between the two cell envelope signal transduction pathways. Indeed, thirteen other members of the GraSR regulon have also been predicted as belonging to the WalkR regulon as they are preceded by a consensus binding site for the WalR response regulator [44,46], such as the *qoxABCD* and SAOUHSC\_00669-SAOUHSC\_00670 operons (indicated by asterisks in Tables 2 & 3, S1 & S2).

In order to validate our microarray data, we chose several relevant genes (*qoxA*, *ssaA*, SAOUHSC\_00669 and *agrB*) and compared their relative expression levels in the parental HG001 strain and the  $\Delta\text{graRS}$  mutant by qRT-PCR. As shown in Fig. 7, we confirmed by qRT-PCR that all of these genes are positively controlled by GraSR, with factors higher than those seen in the transcriptome analysis, ranging from approximately 3- to 29-fold. Results obtained using the two methods showed a linear correlation (Fig. S2; see Supplementary Material).

### GraSR are involved in *S. aureus* resistance to oxidative stress

Since GraSR control the expression of genes that appear to be involved in oxidoreduction processes, we compared the sensitivity to oxidative stress of the parental HG001 strain with that of the ST1036 ( $\Delta\text{graRS}$ ) and ST1070 ( $\Delta\text{graX}$ ) mutants. Cells were grown in TSB in the presence or absence of 40 mM paraquat (methylviologen). No significant difference in growth between the strains was observed in the absence of paraquat (Fig. 8, open symbols). However, as shown in Fig. 8 (closed symbols), the  $\Delta\text{graX}$



**Table 2.** Identification of potential new GraR regulon members by *in silico* genome scanning.

| NCTC 8325 <sup>a</sup> (SAOUHSC_) | Gene or operon                              | DNA strand | Sequence <sup>b</sup>                         | Function <sup>c</sup>                                 |
|-----------------------------------|---------------------------------------------|------------|-----------------------------------------------|-------------------------------------------------------|
|                                   |                                             |            | →←                                            | <b>Antimicrobial resistance</b>                       |
| 00867                             | <i>dlt</i> operon                           | +          | <b>ACAAAATTGT... (N<sub>186</sub>) ...TTG</b> | Teichoic acid D-alanylation                           |
| 01359                             | <i>mprF</i>                                 | +          | <b>ACAAAAGTGT... (N<sub>87</sub>) ...ATG</b>  | Lysylphosphatidylglycerol synthetase                  |
| 02751                             | <i>pnbA</i>                                 | +          | <b>ACAAAATTGT... (N<sub>70</sub>) ...ATG</b>  | Para-nitrobenzyl esterase                             |
| 00667*                            | <i>vraFG</i> operon                         | +          | <b>ACAAAATTGT... (N<sub>150</sub>) ...GTG</b> | ABC transporter                                       |
|                                   |                                             |            |                                               | <b>Transport</b>                                      |
| 00167                             | <i>oppF</i>                                 | –          | <b>ACACATTGT... (N<sub>15</sub>) ...ATG</b>   | Oligopeptide transporter ATP-binding protein          |
| 02815                             | <i>ycbE</i> ( <i>B. amyloliquefaciens</i> ) | –          | <b>ACAATTTGT... (N<sub>85</sub>) ...ATG</b>   | Probable glucarate transporter                        |
| 00669                             |                                             | +          | <b>ACAAAATTGT... (N<sub>84</sub>) ...ATG</b>  | Putative Pit family transporter                       |
|                                   |                                             |            |                                               | <b>Cell envelope modification</b>                     |
| 00992                             | <i>atlR</i> ( <i>S. epidermidis</i> )       | +          | <b>ACAAAATTGT... (N<sub>74</sub>) ...ATG</b>  | Probable ATL autolysin transcription regulator        |
| 02571*                            | <i>ssaA</i>                                 | +          | <b>ACAAAATTGT... (N<sub>264</sub>) ...ATG</b> | Amidase                                               |
| 00972                             | <i>tarM</i> operon                          | +          | <b>ACAATTTGT... (N<sub>16</sub>) ...ATG</b>   | Teichoic acid glycosylation                           |
|                                   |                                             |            |                                               | <b>Oxidoreduction processes</b>                       |
| 01818                             | <i>ald</i>                                  | –          | <b>ACAATTTGT... (N<sub>53</sub>) ...ATG</b>   | Alanine dehydrogenase                                 |
| 01002*                            | <i>qoxABCD</i> operon                       | –          | <b>ACAAATGTGT... (N<sub>134</sub>) ...GTG</b> | Quinol oxidase AA3 subunit II                         |
| 00035                             | <i>yrkE</i> ( <i>B. pumilus</i> )           | +          | <b>ACAAATGTGT... (N<sub>73</sub>) ...ATG</b>  | Probable multidomain redox protein                    |
| 01907                             | <i>ytbE</i> ( <i>B. subtilis</i> )          | –          | <b>ACAAAATTGT... (N<sub>279</sub>) ...ATG</b> | 2,5-didehydrogluconate reductase                      |
| 00882                             |                                             | –          | <b>ACAAAATTGT... (N<sub>250</sub>) ...ATG</b> | NADH dehydrogenase-like                               |
|                                   |                                             |            |                                               | <b>Other functions</b>                                |
| 01637                             | <i>comYC</i>                                | –          | <b>ACAAAATTGT... (N<sub>86</sub>) ...ATG</b>  | Probable competence protein                           |
| 02500                             | <i>rplE</i> operon                          | –          | <b>ACAAAATTGT... (N<sub>82</sub>) ...TTG</b>  | 50S ribosomal protein L5                              |
| 02257                             | <i>sdrH</i>                                 | –          | <b>ACAAAATTGT... (N<sub>505</sub>) ...ATG</b> | Atypical serine-aspartate rich ( <i>sdr</i> ) protein |
| 00903                             | <i>spsB</i>                                 | +          | <b>ACAATTTGT... (N<sub>251</sub>) ...ATG</b>  | Type-1 signal peptidase 1B                            |
| 00776                             | <i>uvrB</i> operon                          | +          | <b>ACAAAATTGT... (N<sub>228</sub>) ...ATG</b> | Excinuclease                                          |
| 01819                             |                                             | +          | <b>ACAAAATTGT... (N<sub>67</sub>) ...ATG</b>  | Universal stress protein UspA-like                    |
| 02816                             |                                             | +          | <b>ACAAAATTGT... (N<sub>446</sub>) ...ATG</b> | Similar to alkaline phosphatase                       |
| 00991                             | <i>ykrP</i> ( <i>L. monocytogenes</i> )     | –          | <b>ACAAAATTGT... (N<sub>58</sub>) ...ATG</b>  | Probable acyltransferase                              |
|                                   |                                             |            |                                               | <b>Unknown function</b>                               |
| 00034                             |                                             | –          | <b>ACACATTGT... (N<sub>43</sub>) ...ATG</b>   | Conserved hypothetical protein                        |
| 00146                             |                                             | –          | <b>ACAAAATTGT... (N<sub>104</sub>) ...ATG</b> | Probable transmembrane protein                        |
| 00971                             |                                             | –          | <b>ACAAAATTGT... (N<sub>247</sub>) ...TTG</b> | Probable transmembrane protein                        |
| 01242                             |                                             | +          | <b>ACAAAATTGT... (N<sub>223</sub>) ...ATG</b> | Conserved hypothetical protein                        |
| 01851                             |                                             | –          | <b>ACACATTGT... (N<sub>260</sub>) ...ATG</b>  | Hypothetical protein                                  |
| 02320                             |                                             | –          | <b>ACAAAATTGT... (N<sub>129</sub>) ...ATG</b> | Hypothetical protein                                  |

<sup>a</sup>Gene names correspond to the annotation of the *S. aureus* NCTC 8325 genome sequence [69]. Only the first gene is indicated for operons.

<sup>b</sup>Positions of the inverted repeats of the potential GraR-binding sites are indicated for the given DNA strand with respect to the translation initiation codon.

<sup>c</sup>Known and putative functions for each regulon member based on genome annotations are indicated. Based on these predictions, the potential regulon members were divided in six categories (antimicrobial resistance, transport, cell envelope modification, oxidoreduction processes, other functions and unknown function).

\*Indicates genes known or predicted to be controlled by the WalKR TCS [44,46].

doi:10.1371/journal.pone.0021323.t002

and  $\Delta$ *graRS* mutants were much more strongly affected by the presence of paraquat than the HG001 parental strain. Moreover, similar results were obtained in the presence of H<sub>2</sub>O<sub>2</sub> for the  $\Delta$ *graRS* mutant (data not shown). These results reveal a novel function for the GraSR system in resistance of *S. aureus* to oxidative stress.

The GraSR system is required for growth of *S. aureus* at high temperature

The GraSR system is involved in cell envelope modifications through regulation of *mprF*, the *dlt* operon and autolysin genes, and also controls the expression of stress response genes (Tables 3, S1 & S2). We therefore tested the ability of the  $\Delta$ *graRS* mutant to grow

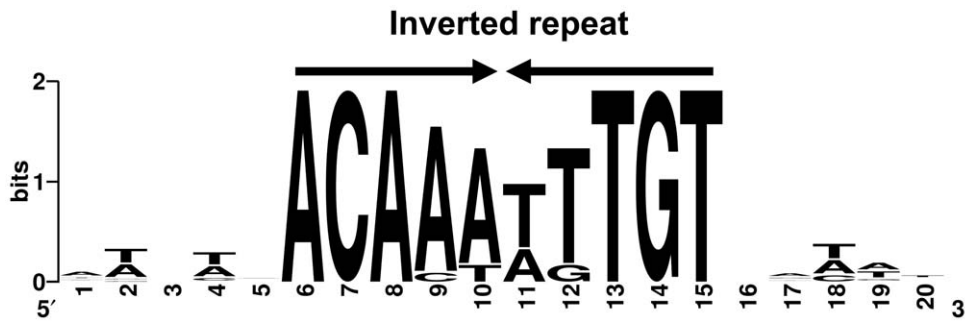

**Figure 6. The GraR operator consensus is a perfect inverted repeat obtained by alignment of regulon gene upstream sequences.** The consensus sequence for the GraR-binding site was generated using the WebLogo tool (<http://weblogo.berkeley.edu/>) by alignment of the upstream sequences of the 29 potential regulon genes identified by *in silico* analysis (Table 2). doi:10.1371/journal.pone.0021323.g006

at high temperatures using a plate spotting assay. Strains ST1120 (HG001 pMK4-Pprot), ST1117 ( $\Delta graRS$  pMK4-Pprot) and the complemented  $\Delta graRS$  mutant,  $\Delta graRS$ -c (Strain ST1116  $\Delta graRS$  pMK4-Pprot-*graR*) were grown in TSB at 37°C and diluted to an OD<sub>600 nm</sub> of 0.2. Serial dilutions were then carried out, spotted on TSA plates and incubated at 37°C or 44°C for 48 h. As shown in Fig. 9, growth of the  $\Delta graRS$  mutant was strongly impaired at 44°C as compared to the parental strain, whereas no differences were observed between the two strains at 37°C. Resistance to high temperatures was almost completely restored in the complemented  $\Delta graRS$ -c strain carrying the *graR* gene on a multicopy plasmid, indicating that this phenotype can be compensated by overproducing the response regulator alone. These results demonstrate an important role for the GraSR system in growth of *S. aureus* at high temperatures.

## Discussion

Cationic antimicrobial peptides (CAMPs) are a major component of host innate immune defense systems, produced by all living organisms, and have emerged as promising therapeutic antimicrobial agents [47,48]. Part of the success of some major human pathogens such as *Staphylococcus aureus* can be attributed to efficient CAMP resistance. One such mechanism involves incorporation of positively charged residues into the envelope, effectively increasing electrostatic repulsion of CAMPs from the cell surface. In *S. aureus*, this is accomplished through D-alanylation of teichoic acids, mediated by the DltABCD enzymes, as well as by MprF-dependent lysylation of phosphatidylglycerol [10]. Expression of *mprF* and the *dlt* operon is induced by the presence of CAMPs and specifically controlled by the GraSR TCS, which has attracted growing interest in recent years [16,17,18,19]. GraSR also control expression of the *vraFG* operon, located directly downstream of the *graXRS* genes and encoding an ABC transporter also playing a role in CAMP resistance [16,17,18,19].

In this study we wished to further define the GraSR regulon and its function. We determined that unlike other TCSs such as VraSR or AgrCA [13,30], GraSR do not autoregulate their own synthesis. We demonstrated that *graX*, cotranscribed with *graRS*, specific to *S. aureus* and also involved in CAMP resistance, encodes an essential regulatory cofactor of the GraSR signaling pathway, effectively constituting a three-component system.

Noting that an imperfect palindromic sequence upstream from the *vraFG* operon had been suggested as a potential regulatory target in a multi-genome analysis of low G+C% Gram-positive bacteria [37], we found this inverted repeat as being highly conserved upstream from two other well-studied GraSR target

genes/operons, *mprF* and *dltXABCD*. Extending our analysis through detailed genome scanning of the *S. aureus* NCTC 8325 genome, we were able to derive a highly conserved ten base pair perfect palindromic sequence (5' ACAA TTTGT 3') upstream from 29 potential GraSR regulon members (Table 2). By a genetic approach combining deletions and point mutations, we were able to conclusively demonstrate that this sequence is essential for transcriptional regulation by GraR and induction in response to CAMPs, indicating it is the likely GraR operator binding site. Despite multiple attempts, we were unable to purify the GraR response regulator in an active form in order to show DNA-binding *in vitro*. However, our proposed GraR operator binding site is similar to that suggested for the closely related VirR response regulator of *Listeria monocytogenes* which was shown to bind to DNA [35]. The two proteins share 46% overall amino acid sequence identity, rising to 73% for the winged helix-turn-helix domain, with 9 out of 11 identical residues in the DNA recognition helix, indicating that they must bind to similar DNA sequences.

Of the 29 potential GraSR regulon members we identified with this binding site present in their upstream regions, we showed that 13 of these are indeed controlled by the GraSR system *in vivo* under our conditions. Of these, nine are positively regulated (*dltXABCD*, *mprF*, *vraFG*, *tarM*, *sdrH*, *ssaA*, SAOUHSC\_00669, *goxABCD*, *rplE*) and four were found to be repressed (SAOUHSC\_00146, SAOUHSC\_00991, SAOUHSC\_00882, SAOUHSC\_02816). This suggests that for the remaining 16 predicted target genes, either the potential GraR binding site is not appropriately located with respect to the promoter in order to allow transcriptional activation/repression, or that additional genetic control mechanisms exist for these genes, preventing their expression under our specific experimental conditions.

During a phenotypic analysis, we observed that the  $\Delta graRS$  mutant displayed increased sensitivity to oxidative stress. This may in part be due to positive control by GraSR of the *mntABC* manganese transporter genes (Table 3), which have been shown to play a role in *S. aureus* resistance to superoxide radicals [49]. Furthermore, these data suggest that the GraSR system may also respond to other signals in *S. aureus*, and not only to the presence of CAMPs. The combined sensitivity of the  $\Delta graRS$  mutant to oxidative stress and antimicrobial peptides could explain the important role of this system in staphylococcal survival in human neutrophils [23,24].

Virulence gene expression in *S. aureus* involves a complex regulatory network, with at least four two-component systems (AgrCA, ArlSR, SaeSR and SrrAB) and several accessory transcription factors (SarA, SarS, SarT, SarR, and Rot) [13]. In this study, our transcriptome analysis allowed us to unveil previously unsuspected connections between the GraSR TCS and the AgrCA signal



**Table 3.** Expression profiling of the  $\Delta$ *graRS* mutant.

| Category/Gene name <sup>a</sup>   | Function/similarity <sup>b</sup>                                                   | HG001/ $\Delta$ <i>graRS</i> transcription ratio <sup>c</sup> | P-value  |
|-----------------------------------|------------------------------------------------------------------------------------|---------------------------------------------------------------|----------|
| <b>Antimicrobial resistance</b>   |                                                                                    |                                                               |          |
| SAOUHSC_02611                     | HP similar to lysostaphin resistance protein A                                     | 3.7                                                           | <1.0E-16 |
| SAOUHSC_01359                     | <i>mprF</i> Phosphatidylglycerol lysyltransferase                                  | 2.8                                                           | <1.0E-16 |
| SAOUHSC_00867                     | HP                                                                                 | 2.7                                                           | <1.0E-16 |
| SAOUHSC_00868                     | <i>dltX</i> HP                                                                     | 2.0                                                           | 1.04E-11 |
| SAOUHSC_00869                     | <i>dltA</i> D-alanine-D-alanyl carrier protein ligase                              | 2.3                                                           | <1.0E-16 |
| SAOUHSC_00871                     | <i>dltC</i> D-alanine carrier protein                                              | 2.0                                                           | 1.78E-11 |
| SAOUHSC_00872                     | <i>dltD</i> D-alanine-activating enzyme/transfer protein                           | 2.1                                                           | 1.38E-14 |
| SAOUHSC_02866                     | HP similar to drug exporter of the RND superfamily                                 | 2.1                                                           | 8.93E-14 |
| SAOUHSC_02629                     | Putative EmrB/QacA family drug resistance transporter                              | 1.8                                                           | 1.16E-09 |
| SAOUHSC_02630                     | HP similar to multidrug resistance protein A                                       | 1.9                                                           | 3.42E-10 |
| SAOUHSC_01866                     | HP similar to aminoglycoside resistance associated protein                         | 1.8                                                           | 5.96E-10 |
| <b>Transport</b>                  |                                                                                    |                                                               |          |
| SAOUHSC_02516                     | HP similar to major facilitator transporter permease                               | 3.6                                                           | <1.0E-16 |
| SAOUHSC_00060*                    | HP similar to Na-Pi cotransporter family protein                                   | 2.5                                                           | <1.0E-16 |
| SAOUHSC_00136                     | HP similar to ABC transporter ATP-binding protein                                  | 2.5                                                           | <1.0E-16 |
| SAOUHSC_00137                     | HP similar to sulfonate/nitrate/taurine transport system substrate-binding protein | 2.0                                                           | 1.41E-12 |
| SAOUHSC_00138                     | HP similar to sulfonate/nitrate/taurine transport system permease                  | 2.2                                                           | 7.11E-15 |
| SAOUHSC_00367                     | HP similar to proton/sodium-glutamate symporter                                    | 2.2                                                           | 1.55E-15 |
| SAOUHSC_02698                     | Putative amino acid ABC transporter permease                                       | 2.1                                                           | 3.60E-14 |
| SAOUHSC_02773                     | Putative aminobenzoyl-glutamate transporter                                        | 2.1                                                           | 2.86E-13 |
| SAOUHSC_00669*                    | HP similar to Pit family transporter                                               | 1.9                                                           | 2.44E-10 |
| SAOUHSC_02699                     | Putative amino acid ABC transporter ATP-binding protein                            | 1.9                                                           | 4.39E-12 |
| SAOUHSC_02482                     | <i>cbiO</i> Cobalt transporter ATP-binding subunit                                 | 1.8                                                           | 5.57E-09 |
| SAOUHSC_02733                     | HP similar to amino acid permease                                                  | 1.8                                                           | 1.38E-09 |
| <b>Cell envelope modification</b> |                                                                                    |                                                               |          |
| SAOUHSC_02576*                    | HP CHAP domain-containing protein                                                  | 18.2                                                          | <1.0E-16 |
| SAOUHSC_02855                     | HP CHAP domain-containing protein                                                  | 15.6                                                          | <1.0E-16 |
| SAOUHSC_00427*                    | <i>sle1</i> N-acetylmuramoyl-L-alanine amidase                                     | 14.9                                                          | <1.0E-16 |
| SAOUHSC_02571*                    | <i>ssaA</i> Secretory antigen SsaA precursor                                       | 8.0                                                           | <1.0E-16 |
| SAOUHSC_00671*                    | HP CHAP domain-containing protein                                                  | 5.8                                                           | <1.0E-16 |
| SAOUHSC_02333*                    | <i>sceD</i> Transglycosylase                                                       | 4.9                                                           | <1.0E-16 |
| SAOUHSC_00994*                    | <i>atlA</i> Bifunctional autolysin                                                 | 4.0                                                           | <1.0E-16 |
| SAOUHSC_02887*                    | <i>isaA</i> Immunodominant antigen A, transglycosylase                             | 5.5                                                           | <1.0E-16 |
| SAOUHSC_00256                     | HP CHAP domain-containing protein                                                  | 2.3                                                           | <1.0E-16 |
| SAOUHSC_02883*                    | HP CHAP domain-containing protein                                                  | 2.2                                                           | 3.11E-15 |
| SAOUHSC_00974                     | <i>tarM</i> wall teichoic acid glycosylation                                       | 1.8                                                           | 1.17E-08 |
| <b>Oxidoreduction processes</b>   |                                                                                    |                                                               |          |
| SAOUHSC_00999*                    | <i>qoxD</i> Quinol oxidase, subunit IV                                             | 4.0                                                           | <1.0E-16 |
| SAOUHSC_01000*                    | <i>qoxC</i> Cytochrome c oxidase subunit III                                       | 3.5                                                           | <1.0E-16 |
| SAOUHSC_01001*                    | <i>qoxB</i> Quinol oxidase subunit I                                               | 4.3                                                           | <1.0E-16 |
| SAOUHSC_01002*                    | <i>qoxA</i> Quinol oxidase AA3 subunit II                                          | 6.9                                                           | <1.0E-16 |
| SAOUHSC_01103                     | <i>sdhC</i> Succinate dehydrogenase cytochrome b-558 subunit                       | 1.8                                                           | 2.66E-15 |
| SAOUHSC_01104                     | <i>sdhA</i> Succinate dehydrogenase flavoprotein subunit                           | 1.9                                                           | 3.73E-11 |
| SAOUHSC_01105                     | <i>sdhB</i> Succinate dehydrogenase iron-sulfur subunit                            | 1.8                                                           | 1.99E-09 |
| <b>Stress</b>                     |                                                                                    |                                                               |          |
| SAOUHSC_00634                     | <i>mntC</i> Putative ABC transporter substrate-binding protein                     | 3.9                                                           | <1.0E-16 |
| SAOUHSC_00636                     | <i>mntB</i> Putative iron (chelated) ABC transporter permease                      | 4.3                                                           | <1.0E-16 |

**Table 3.** Cont.

| Category/Gene name <sup>a</sup> | Function/similarity <sup>b</sup>                                        | HG001/ $\Delta$ <i>graRS</i> transcription ratio <sup>c</sup> | P-value  |
|---------------------------------|-------------------------------------------------------------------------|---------------------------------------------------------------|----------|
| SAOUHSC_00637                   | <i>mntA</i> Putative manganese/iron ABC transporter ATP-binding protein | 2.5                                                           | <1.0E-16 |
| SAOUHSC_03045                   | <i>cspB</i> Cold shock protein CspB                                     | 2.3                                                           | <1.0E-16 |
| SAOUHSC_01730                   | <i>csbD</i> Sigma-B mediated bacterial general stress response protein  | 2.1                                                           | <1.0E-16 |
| SAOUHSC_00819                   | <i>cspC</i> Cold shock protein C                                        | 1.9                                                           | 1.18E-13 |
| SAOUHSC_01403                   | <i>cspA</i> Cold shock protein                                          | 1.9                                                           | 1.13E-10 |
| <b>Regulation</b>               |                                                                         |                                                               |          |
| SAOUHSC_02261                   | <i>agrB</i> Accessory gene regulator protein B                          | 21.6                                                          | <1.0E-16 |
| SAOUHSC_02262                   | <i>agrD</i> Accessory gene regulator protein D                          | 21.0                                                          | <1.0E-16 |
| SAOUHSC_02264                   | <i>agrC</i> Accessory gene regulator protein C                          | 9.3                                                           | <1.0E-16 |
| SAOUHSC_02265                   | <i>agrA</i> Accessory gene regulator protein A                          | 4.2                                                           | <1.0E-16 |
| SAOUHSC_02566                   | <i>sarR</i> Staphylococcal accessory regulator R                        | 3.4                                                           | <1.0E-16 |
| SAOUHSC_00674                   | <i>sarX</i> Staphylococcal accessory regulator protein X                | 3.1                                                           | <1.0E-16 |
| SAOUHSC_00070                   | <i>sarS</i> Staphylococcal accessory regulator A-like                   | 2.7                                                           | <1.0E-16 |
| SAOUHSC_00230                   | <i>lytS</i> Two-component sensor histidine kinase                       | 2.0                                                           | 3.21E-12 |
| SAOUHSC_00231                   | <i>lytR</i> Two-component response regulator                            | 2.0                                                           | 5.40E-12 |
| SAOUHSC_01891                   | <i>arsR</i> Arsenical resistance operon repressor                       | 1.8                                                           | 5.60E-10 |
| SAOUHSC_02388                   | <i>czrA</i> Metal-dependent transcriptional regulator                   | 1.8                                                           | 7.31E-09 |
| <b>Virulence factors</b>        |                                                                         |                                                               |          |
| SAOUHSC_01135                   | HP SLUSH-like haemolytic protein                                        | 44.6                                                          | <1.0E-16 |
| SAOUHSC_01136                   | HP SLUSH-like haemolytic protein                                        | 98.4                                                          | <1.0E-16 |
| SAOUHSC_02260                   | <i>hld</i> Delta-haemolysin                                             | 80.1                                                          | <1.0E-16 |
| SAOUHSC_01110                   | Putative fibrinogen-binding protein                                     | 8.5                                                           | <1.0E-16 |
| SAOUHSC_00300                   | <i>geh</i> Lipase precursor                                             | 4.7                                                           | <1.0E-16 |
| SAOUHSC_01953                   | <i>epiA</i> Lantibiotic epidermin precursor EpiA                        | 3.2                                                           | <1.0E-16 |
| SAOUHSC_02163                   | <i>hlyB</i> Beta-haemolysin                                             | 2.8                                                           | 5.10E-11 |
| SAOUHSC_02167                   | HP Similar to complement inhibitor protein SCIN                         | 2.8                                                           | <1.0E-16 |
| SAOUHSC_01121                   | <i>hlyA</i> Alpha-haemolysin                                            | 2.5                                                           | <1.0E-16 |
| SAOUHSC_02169                   | <i>chp</i> Chemotaxis-inhibiting protein CHIPS                          | 2.4                                                           | <1.0E-16 |
| SAOUHSC_02963                   | <i>clfB</i> Clumping factor ClfB                                        | 2.3                                                           | 2.22E-16 |
| SAOUHSC_01114                   | <i>efb</i> Fibrinogen-binding protein                                   | 1.9                                                           | 4.59E-10 |
| SAOUHSC_02257                   | <i>sdrH</i> Atypical serine-aspartate rich ( <i>sdr</i> ) protein       | 1.9                                                           | 2.84E-10 |
| SAOUHSC_02706                   | <i>sbi</i> Immunoglobulin G-binding protein                             | 1.8                                                           | 2.77E-09 |

<sup>a</sup>Gene names correspond to the annotation of the *S. aureus* NCTC 8325 genome sequence [69].

<sup>b</sup>HP: hypothetical protein.

<sup>c</sup>Fold-change of selected positively regulated genes determined as the ratio of the signal values between strain HG001 and the  $\Delta$ *graRS* mutant. \* Indicates genes known or predicted to be controlled by the WalkR TCS [44,46].

doi:10.1371/journal.pone.0021323.t003

transduction network. Indeed, expression of the *agrBDCA*, *hla*, *hlyB*, *hlyD*, *sarR*, *sarS*, and *sarX* genes are all strongly lowered in the  $\Delta$ *graRS* mutant (Table 3), as well as those of several other genes encoding virulence factors (CHIPS, ClfB, lipase, Sbi, etc.). Part of this effect may be due to Rsr which represses expression of *sarR*, *agr* and *hla* [50]. Indeed, expression of *rsr* is itself repressed by GraSR, increasing approximately 2.6-fold in the  $\Delta$ *graRS* mutant (Table S2). This is the first report linking the GraSR and AgrCA TCSs, which could in part explain the numerous results implicating the GraSR system in *S. aureus* virulence using several experimental models [18,23–26]. It is likely this connection could not be detected in a previous GraSR transcriptome analysis as it was carried out using strain SA113, an *agr* mutant, in the absence of CAMPs as an inducer [16,27]. However, comparing the two sets of transcriptome data obtained during

exponential growth revealed similar numbers of GraSR-regulated genes using the same cutoff values, although significant differences in the genes controlled were observed. Indeed, only 63 genes were common to the two experiments, and 19 differentially regulated in each condition, which may be attributed to differences in the genetic backgrounds of the two strains (HG001 and SA113) or to a different behaviour of the GraSR system under basal growth conditions or upon induction in the presence of CAMPs.

In addition to AgrCA, GraSR also appear to interact with the WalkR TCS, involved in cell wall metabolism and autolysis [45,51], providing increasing evidence for TCS signal transduction networking in *S. aureus*, as described for the Gram-positive model bacterium *B. subtilis* [52]. Regulatory overlap with the WalkR regulon is particularly extensive, with at least 21 WalkR regulon genes also

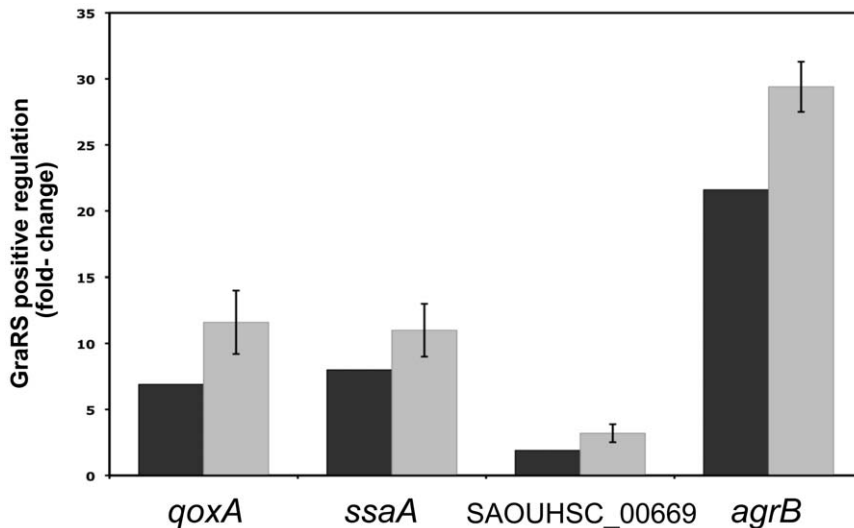

**Figure 7. Correlation between microarray and qRT-PCR experiments for expression of GraSR-dependent genes.** The expression levels of *qoxA*, *ssaA*, SAOUHSC\_00669 and *agrB* genes were analyzed by qRT-PCR in the HG001 and ST1036 ( $\Delta$ *graRS*) strains. RNA samples were prepared from cultures during mid exponential growth after treatment with 50  $\mu\text{g ml}^{-1}$  colistin. Comparative analysis (fold-change) of transcriptome analysis (black bars) and qRT-PCR experiments (grey bars) are shown. Means and standard deviation values for the qRT-PCR data are presented from at least three independent experiments.

doi:10.1371/journal.pone.0021323.g007

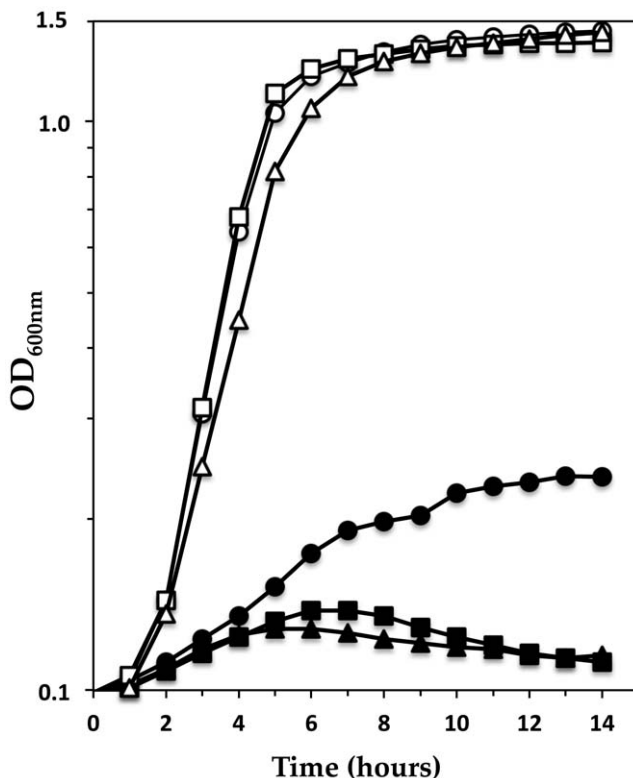

**Figure 8. GraXSR are involved in oxidative stress resistance.** The effect of 40 mM paraquat was analyzed on HG001 (●, ○), ST1036 (■, □;  $\Delta$ *graRS*), ST1070 (▲, △;  $\Delta$ *graX*) strains grown in TSB at 37°C, and diluted to a final OD<sub>600 nm</sub> of 0.025. Growth was followed at 600 nm using a microtiter plate reader in the presence (closed symbols) or absence (open symbols) of 40 mM paraquat (methylviologen). A representative curve of three independent experiments is shown for each strain.

doi:10.1371/journal.pone.0021323.g008

controlled by GraSR, suggesting a significant level of interaction between the two cell envelope signal transduction pathways. These include eight autolysin genes (*atlA*, *sceD*, *isaA*, *ssaA*, *sleI*, SAOUHSC\_00671, SAOUHSC\_02576, SAOUHSC\_02883) that have all been shown to be transcriptionally controlled by WalKR [45] (Delaune *et al.*, in preparation). Thirteen other members of the GraSR regulon have also been predicted as being controlled by WalKR as they are preceded by a consensus binding site for the WalR response regulator, including the *qoxABCD* quinol oxidase biosynthesis operon, the SAOUHSC\_00669-SAOUHSC\_00670 operon, *prs*, encoding a putative ribose-phosphate pyrophosphokinase, the *manA* mannose-6 phosphate isomerase gene, the SAOUHSC\_00738 and *vraFG* ABC transporter genes as well as a gene of unknown function, SAOUHSC\_00060 (Tables 3, S1 & S2) [44,46]. This is reminiscent of genes under multiple regulatory controls, such as the *B. subtilis* *degQ* gene, which is preceded by tandemly arranged binding sites for both the DegU and ComA response regulators [53], and it will be interesting to determine the respective contributions of WalKR and GraSR to expression of their co-regulated genes.

During this investigation, we also showed that GraSR are required for growth of *S. aureus* at high temperatures. This may be linked to their role in modification of wall teichoic acids, which are known to be required for growth under these conditions [54]. This is the first report revealing a function for GraX as a regulatory cofactor of the GraSR TCS, and showing a role for this system in staphylococcal high temperature and oxidative stress survival. We have shown that the GraSR system controls genes involved in stress response, cell wall metabolism and pathogenesis control pathways in addition to its primary role in CAMP resistance, significantly enhancing its importance as a major signal transduction pathway in *S. aureus*.

## Materials and Methods

### Bacterial strains and growth procedures

Bacterial strains and plasmids are listed in Table 4. *Escherichia coli* K12 strain DH5 $\alpha$ <sup>TM</sup> (Invitrogen Life Technologies) was used for cloning experiments. Plasmid constructs were first passed through the restriction modification deficient *S. aureus* strain RN4220 [55]

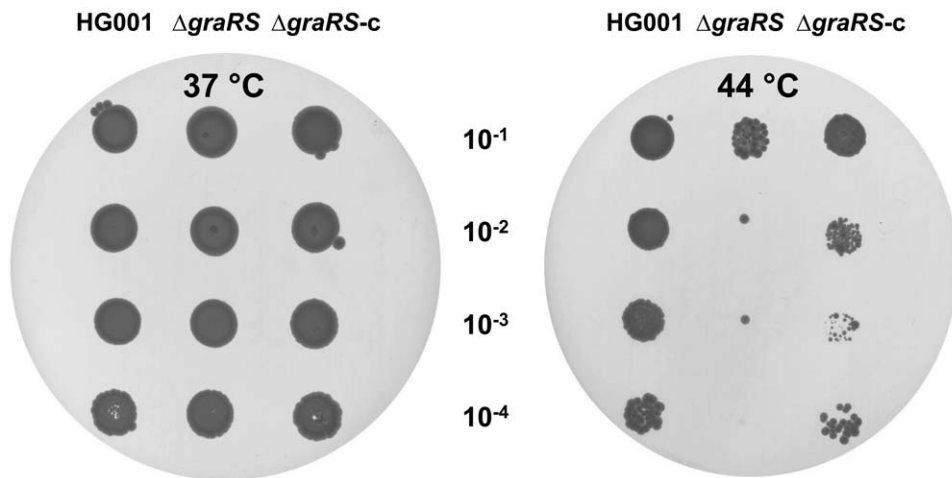

**Figure 9. GraSR are required for growth of *Staphylococcus aureus* at high temperature.** The effect of high temperature was tested on growth of *S. aureus* strains ST1120 (HG001 pMK4-Pprot), ST1117 ( $\Delta$ graRS pMK4-Pprot) and the complemented  $\Delta$ graRS mutant,  $\Delta$ graRS-c (strain ST1116;  $\Delta$ graRS pMK4-Pprot-graR). Strains were grown at 37°C in TSB and diluted to an OD<sub>600 nm</sub> of 0.2. Serial dilutions were then carried out and 10  $\mu$ l of each dilution was spotted on TSA plates, and incubated at 37°C or 44°C for 48 h. doi:10.1371/journal.pone.0021323.g009

before introduction into *S. aureus* strain HG001, a *rsbU*<sup>+</sup> variant of strain NCTC 8325 [27] and its derivatives. HG001 is a genetically tractable, clinically relevant non mutagenized strain and was used for all genetic studies. *E. coli* strains were grown in LB medium with ampicillin (100  $\mu$ g ml<sup>-1</sup>) when required. *S. aureus* was grown in Trypticase Soy Broth (TSB; Difco) with shaking (180 rpm) at 37°C; for plasmid selection, chloramphenicol (10  $\mu$ g ml<sup>-1</sup>) or erythromycin (2  $\mu$ g ml<sup>-1</sup>) were added as required. *E. coli* and *S. aureus* strains were transformed by electroporation using standard protocols [56] and transformants were selected on LB or Trypticase Soy Agar (TSA; Difco) plates, respectively, with the appropriate antibiotics. Colistin sulfate, nisin and indolicidin (Sigma-Aldrich) were used as CAMPs when required.

### DNA manipulations

Oligonucleotides used in this study were synthesized by Sigma-Prologo and are listed in Table 5. *S. aureus* HG001 chromosomal DNA was isolated using the MasterPure<sup>TM</sup> Gram-positive DNA purification Kit (Epicentre Biotechnologies). Plasmids were isolated using a QIAprep Spin Miniprep kit (Qiagen) and PCR fragments were purified using the Qiaquick PCR purification kit (Qiagen). T4 DNA ligase and restriction enzymes (New England Biolabs), PCR reagents and High-Fidelity *Pwo* thermostable DNA Polymerase (Roche) were used according to the manufacturers' recommendations. Nucleotide sequencing of plasmid constructs was carried out by Genome Express-Cogenics or GATC Biotech.

### Plasmid and mutant construction

The thermosensitive shuttle vector pMAD was used for introducing markerless gene deletions [57]. Mutant strains of *S. aureus* HG001 used in this study were obtained by gene deletions, removing the entire coding sequence without the introduction of an antibiotic resistance gene. In a first step, two DNA fragments, of approximately 600 bp, corresponding to the chromosomal DNA regions located directly upstream and downstream from the gene(s) of interest, were generated by PCR, digested with *XhoI* or *BsaI*, and ligated using T4 DNA ligase. The ligation product was reamplified using the external primers and purified before cloning into the temperature-sensitive shuttle vector pMAD between the *EcoRI*/*NcoI* or *SalI*/*BglII* restriction sites. Nucleotide sequences of the constructs were confirmed by DNA sequencing and the resulting

plasmids passed through *S. aureus* strain RN4220 and introduced into *S. aureus* HG001. Integration and excision of the pMAD derivatives and deletion of the chromosomal region of interest was carried out as previously described [57]. Gene deletions in mutant strains were systematically verified by PCR and qRT-PCR.

Plasmid pMK4Pprot, a derivative of vector pMK4 carrying a constitutively expressed Gram-positive promoter sequence [58] was used for gene complementation experiments. Complementation of the ST1036 ( $\Delta$ graRS) strain was carried out using a DNA fragment corresponding to the *graR* gene coding sequence, amplified with oligonucleotides MF118-MF119, generating *BamHI*/*PstI* restriction sites at the extremities, and cloned in the replicative plasmid pMK4-Pprot.

Plasmid pSA14 was used to measure the expression of *S. aureus* genes by constructing transcriptional fusions between gene promoter regions and the *E. coli lacZ* reporter gene. The pSA14 plasmid was constructed by cloning a 3.2 kb *EcoRI*-*PstI* DNA fragment from plasmid pHT304-18Z [59] between the corresponding restriction sites of the pMK4 shuttle vector [60]. The insert carried the promoterless *E. coli lacZ* gene fused to the *B. subtilis spoVG* ribosome binding site [61,62]. In the absence of an upstream promoter, the pSA14 vector displays no detectable  $\beta$ -galactosidase activity, making it a highly useful transcriptional *lacZ* fusion reporter tool for *in vivo* expression analysis. For constructing transcriptional *lacZ* fusions, promoter regions of the *mprF* gene and the *graXRS* and *vraFG* operons, and truncated promoter regions of *mprF* gene and the *vraFG* operon were amplified by PCR using oligonucleotides introducing *BamHI*/*PstI* restriction sites, except for the *vraF2\*-lacZ* fusion, constructed using a forward oligonucleotide containing seven mismatches generating point mutations (see Table 5). The corresponding DNA fragments were then cloned between the corresponding restriction sites of the pSA14 vector, yielding plasmids listed in Table 4. The pSA*tufA* plasmid [63] carrying the strong constitutive promoter of the *tufA* gene was used as a control.

### MIC determinations

MIC determinations were performed in a 96-well microtiter plate with a 100  $\mu$ l culture volume. Bacterial cultures were grown for eight hours in TSB at 37°C, diluted to an OD<sub>600 nm</sub> = 0.05 and used to inoculate wells containing TSB with standard two-fold

**Table 4.** Bacterial strains and plasmids used in this study.

| Strain or plasmid            | Relevant genotype or description                                                                                                                                                                                                                                     | Source or construction <sup>a</sup>             |
|------------------------------|----------------------------------------------------------------------------------------------------------------------------------------------------------------------------------------------------------------------------------------------------------------------|-------------------------------------------------|
| <b>Strains</b>               |                                                                                                                                                                                                                                                                      |                                                 |
| <i>Escherichia coli</i>      |                                                                                                                                                                                                                                                                      |                                                 |
| DH5 $\alpha$ <sup>TM</sup>   | F <sup>-</sup> [ $\Phi$ 80 ( $\Delta$ lacZ $\Delta$ M15) $\Delta$ ( <i>lacZ</i> YA- <i>argF</i> ) U169 <i>recA1 endA1 hsdR17</i> ( <i>r<sub>K</sub><sup>-</sup></i> , <i>m<sub>K</sub><sup>+</sup></i> ) <i>phoA supE44 <math>\lambda</math>- thi-1 gyrA96 relA1</i> | Invitrogen Life Technologies                    |
| <i>Staphylococcus aureus</i> |                                                                                                                                                                                                                                                                      |                                                 |
| RN4220                       | Restriction deficient transformation recipient                                                                                                                                                                                                                       | [55]                                            |
| HG001                        | NCTC 8325 <i>rsbU</i> <sup>+</sup>                                                                                                                                                                                                                                   | [27]                                            |
| ST1036                       | $\Delta$ <i>graRS</i>                                                                                                                                                                                                                                                | pMAD <i>graRS</i> $\rightarrow$ HG001           |
| ST1039                       | <i>vraF</i> <sup>-</sup> - <i>lacZ</i> , Cm <sup>r</sup>                                                                                                                                                                                                             | pSA14 <i>vraF</i> $\rightarrow$ HG001           |
| ST1040                       | $\Delta$ <i>AvraF</i> <sup>-</sup> - <i>lacZ</i> , Cm <sup>r</sup>                                                                                                                                                                                                   | pSA14 $\Delta$ <i>AvraF</i> $\rightarrow$ HG001 |
| ST1041                       | $\Delta$ <i>graRS vraF</i> <sup>-</sup> - <i>lacZ</i> , Cm <sup>r</sup>                                                                                                                                                                                              | pSA14 <i>vraF</i> $\rightarrow$ ST1036          |
| ST1052                       | $\Delta$ <i>graX vraF</i> <sup>-</sup> - <i>lacZ</i> , Cm <sup>r</sup>                                                                                                                                                                                               | pSA14 <i>vraF</i> $\rightarrow$ ST1070          |
| ST1070                       | $\Delta$ <i>graX</i>                                                                                                                                                                                                                                                 | pMAD <i>graX</i> $\rightarrow$ HG001            |
| ST1074                       | <i>mprF</i> <sup>-</sup> - <i>lacZ</i> , Cm <sup>r</sup>                                                                                                                                                                                                             | pSA14 <i>mprF</i> $\rightarrow$ HG001           |
| ST1075                       | $\Delta$ <i>graRS mprF</i> <sup>-</sup> - <i>lacZ</i> , Cm <sup>r</sup>                                                                                                                                                                                              | pSA14 <i>mprF</i> $\rightarrow$ ST1036          |
| ST1082                       | <i>graX</i> <sup>-</sup> - <i>lacZ</i> , Cm <sup>r</sup>                                                                                                                                                                                                             | pSA14 <i>graX</i> $\rightarrow$ HG001           |
| ST1105                       | $\Delta$ <i>graX mprF</i> <sup>-</sup> - <i>lacZ</i> , Cm <sup>r</sup>                                                                                                                                                                                               | pSA14 <i>mprF</i> $\rightarrow$ ST1070          |
| ST1111                       | $\Delta$ <i>AmprF</i> <sup>-</sup> - <i>lacZ</i> , Cm <sup>r</sup>                                                                                                                                                                                                   | pSA14 $\Delta$ <i>AmprF</i> $\rightarrow$ HG001 |
| ST1112                       | $\Delta$ <i>graRS graX</i> <sup>-</sup> - <i>lacZ</i> , Cm <sup>r</sup>                                                                                                                                                                                              | pSA14 <i>graX</i> $\rightarrow$ ST1036          |
| ST1116                       | $\Delta$ <i>graRS pMK4-PprotgraR</i> , Cm <sup>r</sup>                                                                                                                                                                                                               | pMK4-Pprot <i>graR</i> $\rightarrow$ ST1036     |
| ST1117                       | $\Delta$ <i>graRS pMK4-Pprot</i> , Cm <sup>r</sup>                                                                                                                                                                                                                   | pMK4-PprotST1036                                |
| ST1120                       | pMK4-Pprot, Cm <sup>r</sup>                                                                                                                                                                                                                                          | pMK4-Pprot $\rightarrow$ HG001                  |
| ST1168                       | <i>vraF2</i> <sup>-</sup> - <i>lacZ</i> , Cm <sup>r</sup>                                                                                                                                                                                                            | pSA14 <i>vraF2</i> $\rightarrow$ HG001          |
| ST1169                       | <i>vraF2*</i> <sup>-</sup> - <i>lacZ</i> , Cm <sup>r</sup>                                                                                                                                                                                                           | pSA14 <i>vraF2*</i> $\rightarrow$ HG001         |
| ST1176                       | $\Delta$ <i>graX graX</i> <sup>-</sup> - <i>lacZ</i> , Cm <sup>r</sup>                                                                                                                                                                                               | pSA14 <i>graX</i> $\rightarrow$ ST1070          |
| ST1199                       | <i>PtufA</i> <sup>-</sup> - <i>lacZ</i> , Cm <sup>r</sup>                                                                                                                                                                                                            | pSA14 <i>tufA</i> $\rightarrow$ HG001           |
| <b>Plasmids</b>              |                                                                                                                                                                                                                                                                      |                                                 |
| pMAD                         | pE194 derivative with a thermosensitive origin of replication for deletion/replacement of genes in Gram-positive bacteria                                                                                                                                            | [57]                                            |
| pMAD <i>graRS</i>            | pMAD derivative allowing deletion of the <i>graRS</i> genes                                                                                                                                                                                                          | This study                                      |
| pMAD <i>graX</i>             | pMAD derivative allowing deletion of the <i>graX</i> gene                                                                                                                                                                                                            | This study                                      |
| pSA14                        | pMK4 derivative carrying the promoterless <i>E. coli lacZ</i> gene for constructing transcriptional fusions                                                                                                                                                          | This study                                      |
| pSA14 <i>vraF1</i>           | pSA14 derivative carrying the intergenic region between <i>graXRS</i> and <i>vraFG</i>                                                                                                                                                                               | This study                                      |
| pSA14 $\Delta$ <i>AvraF1</i> | pSA14 derivative carrying the truncated intergenic region between <i>graXRS</i> and <i>vraFG</i>                                                                                                                                                                     | This study                                      |
| pSA14 <i>mprF</i>            | pSA14 derivative carrying the <i>mprF</i> promoter region                                                                                                                                                                                                            | This study                                      |
| pSA14 $\Delta$ <i>AmprF</i>  | pSA14 derivative carrying the <i>mprF</i> truncated promoter                                                                                                                                                                                                         | This study                                      |
| pSA14 <i>graX</i>            | pSA14 derivative carrying the <i>graX</i> promoter region                                                                                                                                                                                                            | This study                                      |
| pSA14 <i>vraF2</i>           | pSA14 derivative carrying the <i>vraFG</i> promoter region                                                                                                                                                                                                           | This study                                      |
| pSA14 <i>vraF2*</i>          | pSA14 derivative carrying the truncated <i>vraFG</i> promoter region                                                                                                                                                                                                 | This study                                      |
| pSA14 <i>tufA</i>            | pSA14 derivative carrying the <i>tufA</i> promoter region                                                                                                                                                                                                            | [63]                                            |
| pMK4Pprot                    | pMK4 derivative carrying a constitutive Gram-positive promoter for gene complementation                                                                                                                                                                              | [58]                                            |
| pMK4-Pprot <i>graR</i>       | pMK4-Pprot derivative carrying <i>graR</i>                                                                                                                                                                                                                           | This study                                      |

<sup>a</sup>Arrows indicate plasmid introduction by electroporation.  
doi:10.1371/journal.pone.0021323.t004

increments of colistin concentration (v/v). Plates were incubated for 12 h with vigorous shaking at 37°C in a Synergy 2 thermoregulated spectrophotometer plate reader using the Gen5<sup>TM</sup> Microplate Software (BioTek Instruments Inc., Winooski, VT). All experiments were performed in triplicate.

#### Extraction of total RNA

Cells were grown until OD<sub>600 nm</sub> = 1, and colistin was added to the medium at 50  $\mu$ g ml<sup>-1</sup> or 200  $\mu$ g ml<sup>-1</sup> when required. Growth was pursued during 30 min and cells were harvested by centrifuging 30 ml culture samples (4 min; 5,400 x g) and

**Table 5.** Oligonucleotides used in this study\*.

| Name   | Sequence                                            | Description                                                                                      |
|--------|-----------------------------------------------------|--------------------------------------------------------------------------------------------------|
| MF9    | 5'-GTCGTCGACGAGCAGCGGCTATCAATCAA-3'                 | <i>graRS</i> upstream region, deletion mutant                                                    |
| MF10   | 5'-CTCCTCGAGTATTGTCATCCATACACCC-3'                  |                                                                                                  |
| MF11   | 5'-CTCCTCGAGTTGAACGCATGTCGGAAGT-3'                  | <i>graRS</i> downstream region, deletion mutant                                                  |
| MF12   | 5'-AGAAGATCTGCACCTGTTGGTTCGTCAGC-3'                 |                                                                                                  |
| MF35   | 5'-GAAGAATTGTCATCATAATATTACCATCG-3'                 | <i>graX</i> upstream region, deletion mutant                                                     |
| MF36   | 5'-GGTGGTCTCTCACATCTAAAATACTCCTT-3'                 |                                                                                                  |
| MF37   | 5'-GGTGGTCTCATGTGATATTGGGTGATAG-3'                  | <i>graX</i> downstream region, deletion mutant                                                   |
| MF38   | 5'-CCACCATGGTTAACGTATTATCACTAACA-3'                 |                                                                                                  |
| MF62   | 5'-CGTAACATTGAAATGAAATTTTCTACATC-3'                 | <i>graXRS</i> promoter region, primer extension                                                  |
| MF63   | 5'-ACCAATATATCCTGTCCACCTGTAATAA-3'                  |                                                                                                  |
| MF66   | 5'-ATGAAATTGTTGAACGCATGTCGGAAGT-3'                  | <i>vraFG</i> promoter region, primer extension                                                   |
| MF67   | 5'-TCGCAACACTTCTGTGCCATTTTTAGT-3'                   |                                                                                                  |
| MF69   | 5'-AGATTTTCATATTGCACCTCTTAAAGTTC-3'                 | <i>dltXABCD</i> promoter region, primer extension                                                |
| MF70   | 5'-GCGGTTATGACAAATCAGGTACCACATACT-3'                |                                                                                                  |
| MF74   | 5'-CTGCTGCAGGGGACAACCTGTCAGATTGATT-3'               | <i>graXRS</i> and <i>vraFG</i> intergenic region ( <i>vraF1</i> ), <i>lacZ</i> fusions           |
| MF75   | 5'-GGAGGATCCTTAACCTCATTCTTTAGGC-3'                  |                                                                                                  |
| MF77   | 5'-GTATAGATAACCATATTGTTCTGTTTGA-3'                  | <i>mprF</i> promoter region, primer extension                                                    |
| MF78   | 5'-GATAACTCCCGATACAATGTGATTGCTACA-3'                |                                                                                                  |
| MF88   | 5'-CTGCTGCAGTTAAACATGCGTTTTGTT-3'                   | <i>graXRS</i> and <i>vraFG</i> truncated intergenic region ( <i>vraF1</i> ), <i>lacZ</i> fusions |
| MF89   | 5'-CTGCTGCAGTATAGATAACCATATTGTTT-3'                 | <i>mprF</i> promoter region, <i>lacZ</i> fusions                                                 |
| MF90   | 5'-GGAGGATCCTGATTCAATTTTTACATCA-3'                  |                                                                                                  |
| MF91   | 5'-CTGCTGCAGTATAAATCAAAGTAAATG-3'                   | <i>mprF</i> truncated promoter region, <i>lacZ</i> fusions                                       |
| MF95   | 5'-CTGCTGCAGATTCTGCTATATGTTGCT-3'                   | <i>graXRS</i> promoter region, <i>lacZ</i> fusions                                               |
| MF96   | 5'-GGAGGATCAATATATCCTGTCCACCTGCT-3'                 |                                                                                                  |
| MF97   | 5'-CTGCTGCAGTCGTTGCGTTATGCAA-3'                     | <i>tufA</i> promoter region, complementation                                                     |
| MF98   | 5'-GGAGGATCCACTCTCTCATGATAGTTTCT-3'                 |                                                                                                  |
| MF118  | 5'-GGAGGATCCGAGGTGATGATGGATGCAAATAC-3'              | <i>graR</i> coding sequence, complementation                                                     |
| MF119  | 5'-CTGCTGCAGTTATTCATGAGCCATATATCCTT-3'              |                                                                                                  |
| OSA161 | 5'-TACCTTACCAACTAGCTAATGCAGCG-3'                    | 16S intragenic region, qRT-PCR                                                                   |
| OSA162 | 5'-ACGTGGATAACCTACTATAAGACTGGGAT-3'                 |                                                                                                  |
| OAH131 | 5'-TGTTGACTGCAGGTCGGAACCTTCAACTCTGTAAGTAAACATGCG-3' | <i>vraFG</i> promoter region ( <i>vraF2</i> ), <i>lacZ</i> fusions                               |
| OAH132 | 5'-TGTTGACTGCAGGTCGGAAGTGACAAATTTGTC-3'             | <i>vraFG</i> mutated promoter region ( <i>vraF2*</i> ), <i>lacZ</i> fusions                      |

\*Added restriction site sequences are indicated in italics.  
doi:10.1371/journal.pone.0021323.t005

immediately frozen at  $-80^{\circ}\text{C}$ . RNA extractions were then performed as previously described [64], followed by a DNase I treatment with the TURBO DNA-free reagent (Ambion, Austin, TX) in order to eliminate residual contaminating genomic DNA.

### Primer extensions

Primer extensions were performed as previously described [65] using 30  $\mu\text{g}$  of RNA, 2 pmol of oligonucleotide (previously radiolabeled with  $[\gamma\text{-}^{32}\text{P}]$  ATP using T4 polynucleotide kinase, New England Biolabs), and 200 U of Superscript II reverse transcriptase (Invitrogen). Oligonucleotides were chosen so as to hybridize downstream from the translation initiation codon (see Table 5). The corresponding DNA sequencing reactions were carried out with the same oligonucleotides and PCR-amplified DNA fragments carrying the respective promoter regions, using the Sequenase PCR product sequencing kit (USB, Cleveland, OH).

### $\beta$ -Galactosidase assays

Cells were grown until  $\text{OD}_{600\text{ nm}} = 1$ , colistin was added to the medium at  $50\ \mu\text{g ml}^{-1}$  or  $200\ \mu\text{g ml}^{-1}$  when required and growth was pursued for 30 min. *S. aureus* strains carrying the different *lacZ* fusions were then harvested by centrifuging 2 ml culture samples (2 min;  $20,800 \times g$ ). Cells were resuspended in 500  $\mu\text{l}$  of Z buffer [66] with 0.5  $\text{mg ml}^{-1}$  DNase, 5 mM DTT and 0.1  $\text{mg ml}^{-1}$  lysostaphin added extemporaneously, and lysed by incubation at  $37^{\circ}\text{C}$  for 30 min. Cell debris were eliminated by centrifugation (2 min;  $20,800 \times g$ ) and the supernatant was either used directly for assays or stored at  $-20^{\circ}\text{C}$ . Assays were performed as previously described and  $\beta$ -galactosidase specific activity was expressed as Miller units  $\text{mg}^{-1}$  protein [66]. Protein concentrations were determined using the Bio-Rad protein assay (BioRad, Hercules, CA) [67]. All experiments were carried out in triplicate.



## Microarray experiments

RNA samples for tiling arrays were prepared as described above using cultures of *S. aureus* strains HG001 and ST1036 ( $\Delta$ graRS) grown in TSB with 50  $\mu\text{g ml}^{-1}$  colistin for GraSR induction, with an additional 2-fold dilution step in killing buffer (20 mM Tris-HCl pH 7.5, 5 mM  $\text{MgCl}_2$ , 20 mM  $\text{NaN}_3$ ) before centrifugation. RNA samples were then treated using the RNA Clean-Up kit (Norgen Biotech Corp., Canada) according to the manufacturer's recommendations and eluted in 40  $\mu\text{l}$  of RNase-free water. RNA preparations were quantified using a spectrophotometer at 260 nm and quality was checked by electrophoregram analysis on a BioAnalyzer (Agilent).

The BaSysBio Sau T1 NimbleGen 385K array was designed with a total of 383,452 features using OligoWiz 2.0 [68], with long iso-thermal probes (45–65 nt) covering the entire genome of *Staphylococcus aureus* NCTC 8325 (CP000253.1; [69] in 18 nt intervals on each strand (Hanne Jarmer, Technical University of Denmark, Lyngby, Denmark, personal communication). Tiling array experiments were carried out with 20  $\mu\text{g}$  of each RNA sample, sent to Roche NimbleGen (Madison, WI, USA) where it was labelled and hybridized to the BaSysBio Sau T1 chip using the BaSysBio protocol for strand-specific hybridization [70]. All tiling array experiments were performed in triplicate using RNA isolated from independent cultures.

For data analysis, an aggregated expression value was computed for each Genbank annotated CDS as the median  $\log_2$  intensity of probes lying entirely within the corresponding region (Pierre Nicolas, MIG INRA Jouy-en Josas, personal communication). To control for possible cross-hybridization artefacts the sequence of each probe was BLAST-aligned against the whole chromosome sequence and probes with a SeqS value above the 1.5 cut-off were discarded (SeqS is 2 for a probe with two exact matches) [71].

Aggregated intensity values of the individual samples were normalized by median scaling using the Rosetta Resolver software (version 7.2.1, Rosetta Biosoftware). Statistical significance of differential expression between the wild type and the mutant strain was then evaluated using the  $Z$ -test (ArrayStat software package, GE Lifesciences). Differentially expressed genes were chosen with a ratio between the wild-type and mutant strain  $\geq 1.8$  and a P-value  $\leq 3.5 \times 10^{-4}$ . The complete MIAME compliant microarray data set is available at the NIH Gene Expression Omnibus (GEO) database under record number GSE26016: (<http://www.ncbi.nlm.nih.gov/geo/query/acc.cgi?token=vbcbxmyikmqotq&acc=GSE26016>).

## cDNA synthesis and qRT-PCRs

cDNAs were synthesized using the iScript cDNA synthesis kit (Bio-Rad, Hercules, CA) according to the manufacturer's recommendations, in a 20  $\mu\text{l}$  final reaction volume containing 1  $\mu\text{g}$  total RNA. For qRT-PCR experiments, amplicon primers were designed using the BEACON Designer 4.02 software (Premier Biosoft International, Palo Alto, CA) (see Table 5). Quantitative real-time PCRs (qRT-PCRs), critical threshold cycles (CT) and  $n$ -fold changes in transcript levels were performed and determined as previously described and normalized with respect to 16S rRNA whose levels did not vary under our experimental conditions [45]. All experiments were performed in triplicate.

## Oxidative stress

*S. aureus* strains were treated with paraquat (methylviologen-dichloride hydrate) or  $\text{H}_2\text{O}_2$  (Sigma Aldrich) and growth was followed in a 96-well microtiter plate (100  $\mu\text{l}$  culture volume).

Bacterial cultures were grown in TSB, diluted to an  $\text{OD}_{600\text{ nm}} = 0.05$  and used to inoculate wells containing TSB with or without 40 mM paraquat, or 0.004%  $\text{H}_2\text{O}_2$ . Plates were incubated for 14 h with vigorous shaking at 37°C in a Synergy 2 thermoregulated spectrophotometer plate reader using the Gen5™ Microplate Software (BioTek Instruments Inc., Winooski, VT). All experiments were performed at least in duplicate.

## High temperature growth

The effect of high temperatures was observed on *S. aureus* strains ST1120 (pMK4-Pprot), ST1116 ( $\Delta$ graRS-c;  $\Delta$ graRS pMK4-Pprot-graR) and ST1117 ( $\Delta$ graRS pMK4-Pprot), on cells grown in TSB at 37°C and diluted to an  $\text{OD}_{600\text{ nm}} = 0.2$ . Cultures were serially diluted ( $10^{-1}$ ,  $10^{-2}$ ,  $10^{-3}$  and  $10^{-4}$  fold) and 10  $\mu\text{l}$  of each dilution was spotted onto TSA plates, which were dried for 10 min at room temperature and incubated at 37°C or 44°C for 48 h.

## Supporting Information

**Figure S1 *lacZ* fusion control experiment expression analysis (A) Expression of *tufA'-lacZ* is not induced by colistin.** Expression of the *tufA'-lacZ* fusion was measured in strain ST1189 (HG001 *tufA'-lacZ*) during mid-exponential growth at 37°C in TSB (grey bars) or after treatment with 200  $\mu\text{g ml}^{-1}$  colistin (black bars).  $\beta$ -Galactosidase assays were performed as described in Materials and Methods. **(B) Indolicidin induces expression of the *vraFG* operon and *mprF*.** Expression of *vraF'-lacZ* and *mprF'-lacZ* fusions in *S. aureus* strain HG001 was measured during mid-exponential growth at 37°C in TSB (grey bars) or after treatment with 5  $\mu\text{g ml}^{-1}$  indolicidin (black bars).  $\beta$ -Galactosidase assays were performed as described in *Experimental Procedures*. (TIF)

**Figure S2 Linear correlation between microarray and qRT-PCR experiments for expression of GraSR-dependent genes.** Fold changes in expression as measured by qRT-PCR and transcriptome analysis measured for 4 representative genes in the *S. aureus* HG001 strain relative to the ST1036 ( $\Delta$ graRS) strain grown in the same conditions were plotted against each other to evaluate their correlation. Data points were analyzed in triplicate by both methods. (TIF)

**Table S1 Genes positively controlled by GraSR.** (XLS)

**Table S2 Genes negatively controlled by GraSR.** (XLS)

## Acknowledgments

We are grateful to Cécile Wandersman for critical reading of the manuscript. We thank Olivier Poupel for assistance with qRT-PCR experiments, as well as Hanne Jarmer for array design, Pierre Nicolas and Aurélie LeDuc for kind assistance with generating microarray aggregated expression values, and Charlène Blanchet for numerous virulence assays.

## Author Contributions

Conceived and designed the experiments: TM MF AH. Performed the experiments: MF AH MD. Analyzed the data: TM MF UM. Contributed reagents/materials/analysis tools: MF AH MD UM. Wrote the paper: TM MF.

## References

- Lowy FD (1998) *Staphylococcus aureus* infections. *N Engl J Med* 339: 520–532.
- Wertheim HF, Melles DC, Vos MC, van Leeuwen W, van Belkum A, et al. (2005) The role of nasal carriage in *Staphylococcus aureus* infections. *Lancet Infect Dis* 5: 751–762.
- Nizet V (2007) Understanding how leading bacterial pathogens subvert innate immunity to reveal novel therapeutic targets. *J Allergy Clin Immunol* 120: 13–22.
- Lowy FD (2003) Antimicrobial resistance: the example of *Staphylococcus aureus*. *J Clin Invest* 111: 1265–1273.
- Chang S, Sievert DM, Hageman JC, Boulton ML, Tenover FC, et al. (2003) Infection with vancomycin-resistant *Staphylococcus aureus* containing the vanA resistance gene. *New England Journal of Medicine* 348: 1342–1347.
- Perichon B, Courvalin P (2009) VanA-type vancomycin-resistant *Staphylococcus aureus*. *Antimicrob Agents Chemother* 53: 4580–4587.
- Hancock RE (2001) Cationic peptides: effectors in innate immunity and novel antimicrobials. *Lancet Infect Dis* 1: 156–164.
- Hancock RE, Chapple DS (1999) Peptide antibiotics. *Antimicrob Agents Chemother* 43: 1317–1323.
- Hale JD, Hancock RE (2007) Alternative mechanisms of action of cationic antimicrobial peptides on bacteria. *Expert Rev Anti Infect Ther* 5: 951–959.
- Nizet V (2006) Antimicrobial peptide resistance mechanisms of human bacterial pathogens. *Curr Issues Mol Biol* 8: 11–26.
- Mascher T (2006) Intramembrane-sensing histidine kinases: a new family of cell envelope stress sensors in Firmicutes bacteria. *FEMS Microbiol Lett* 264: 133–144.
- Kuroda M, Ohta T, Uchiyama I, Baba T, Yuzawa H, et al. (2001) Whole genome sequencing of methicillin-resistant *Staphylococcus aureus*. *Lancet* 357: 1225–1240.
- Novick RP (2003) Autoinduction and signal transduction in the regulation of staphylococcal virulence. *Mol Microbiol* 48: 1429–1449.
- Pietiläinen M, Francois P, Hyyryläinen HL, Tangomo M, Sass V, et al. (2009) Transcriptome analysis of the responses of *Staphylococcus aureus* to antimicrobial peptides and characterization of the roles of *vraDE* and *vraSR* in antimicrobial resistance. *BMC Genomics* 10: 429.
- Cui L, Lian JQ, Neoh HM, Reyes E, Hiramatsu K (2005) DNA microarray-based identification of genes associated with glycopeptide resistance in *Staphylococcus aureus*. *Antimicrob Agents Chemother* 49: 3404–3413.
- Herbert S, Bera A, Nerz C, Kraus D, Peschel A, et al. (2007) Molecular basis of resistance to muramidase and cationic antimicrobial peptide activity of lysozyme in staphylococci. *PLoS Pathog* 3: e102.
- Li M, Lai Y, Villaruz AE, Cha DJ, Sturdevant DE, et al. (2007) Gram-positive three-component antimicrobial peptide-sensing system. *Proc Natl Acad Sci U S A* 104: 9469–9474.
- Li M, Cha DJ, Lai Y, Villaruz AE, Sturdevant DE, et al. (2007) The antimicrobial peptide-sensing system *aps* of *Staphylococcus aureus*. *Mol Microbiol* 66: 1136–1147.
- Meehl M, Herbert S, Gotz F, Cheung A (2007) Interaction of the GraRS two-component system with the VraFG ABC transporter to support vancomycin-intermediate resistance in *Staphylococcus aureus*. *Antimicrob Agents Chemother* 51: 2679–2689.
- Sass P, Bierbaum G (2009) Native *graS* mutation supports the susceptibility of *Staphylococcus aureus* strain SG511 to antimicrobial peptides. *Int J Med Microbiol* 299: 313–322.
- Shanks RM, Meehl MA, Brothers KM, Martinez RM, Donegan NP, et al. (2008) Genetic evidence for an alternative citrate-dependent biofilm formation pathway in *Staphylococcus aureus* that is dependent on fibronectin binding proteins and the GraRS two-component regulatory system. *Infect Immun* 76: 2469–2477.
- Boles BR, Thoendel M, Roth AJ, Horswill AR (2010) Identification of genes involved in polysaccharide-independent *Staphylococcus aureus* biofilm formation. *PLoS One* 5: e10146.
- Cheung GY, Rigby K, Wang R, Queck SY, Braughton KR, et al. (2010) *Staphylococcus epidermidis* strategies to avoid killing by human neutrophils. *PLoS Pathog* 6.
- Kraus D, Herbert S, Kristian SA, Khosravi A, Nizet V, et al. (2008) The GraRS regulatory system controls *Staphylococcus aureus* susceptibility to antimicrobial host defenses. *BMC Microbiol* 8: 85.
- Tabuchi Y, Shiratsuchi A, Kurokawa K, Gong JH, Sekimizu K, et al. (2010) Inhibitory role for D-alanylation of wall teichoic acid in activation of insect Toll pathway by peptidoglycan of *Staphylococcus aureus*. *J Immunol* 185: 2424–2431.
- Kurokawa K, Kaito C, Sekimizu K (2007) Two-component signaling in the virulence of *Staphylococcus aureus*: a silkworm larvae-pathogenic agent infection model of virulence. *Methods Enzymol* 422: 233–244.
- Herbert S, Ziebandt AK, Ohlsen K, Schafer T, Hecker M, et al. (2010) Repair of global regulators in *Staphylococcus aureus* 8325 and comparative analysis with other clinical isolates. *Infect Immun* 78: 2877–2889.
- Weinrauch Y, Penchev R, Dubnau E, Smith I, Dubnau D (1990) A *Bacillus subtilis* regulatory gene product for genetic competence and sporulation resembles sensor protein members of the bacterial two-component signal-transduction systems. *Genes and Development* 4: 860–872.
- Kobayashi K, Ogura M, Yamaguchi H, Yoshida K, Ogasawara N, et al. (2001) Comprehensive DNA microarray analysis of *Bacillus subtilis* two-component regulatory systems. *J Bacteriol* 183: 7365–7370.
- Belcheva A, Verma V, Golemi-Kotra D (2009) DNA-binding activity of the vancomycin resistance associated regulator protein VraR and the role of phosphorylation in transcriptional regulation of the *vraSR* operon. *Biochemistry* 48: 5592–5601.
- Koprivnjak T, Mlakar V, Swanson L, Fournier B, Peschel A, et al. (2006) Cation-induced transcriptional regulation of the *dlt* operon of *Staphylococcus aureus*. *J Bacteriol* 188: 3622–3630.
- Haugen SP, Ross W, Gourse RL (2008) Advances in bacterial promoter recognition and its control by factors that do not bind DNA. *Nat Rev Microbiol* 6: 507–519.
- Martinez-Hackert E, Stock AM (1997) Structural relationships in the OmpR family of winged-helix transcription factors. *Journal of Molecular Biology* 269: 301–312.
- Blanco AG, Sola M, Gomis-Ruth FX, Coll M (2002) Tandem DNA recognition by PhoB, a two-component signal transduction transcriptional activator. *Structure* 10: 701–713.
- Mandin P, Fsihi H, Dussurget O, Vergassola M, Milohanic E, et al. (2005) VirR, a response regulator critical for *Listeria monocytogenes* virulence. *Mol Microbiol* 57: 1367–1380.
- Ohki R, Giyanto, Tateno K, Masuyama W, Moriya S, et al. (2003) The BceRS two-component regulatory system induces expression of the bacitracin transporter, BceAB, in *Bacillus subtilis*. *Mol Microbiol* 49: 1135–1144.
- de Been M, Bart MJ, Abee T, Siczek R, Francke C (2008) The identification of response regulator-specific binding sites reveals new roles of two-component systems in *Bacillus cereus* and closely related low-GC Gram-positives. *Environ Microbiol* 10: 2796–2809.
- Rutherford K, Parkhill J, Crook J, Horsnell T, Rice P, et al. (2000) Artemis: sequence visualization and annotation. *Bioinformatics* 16: 944–945.
- Zock J, Cantwell C, Swartling J, Hodges R, Pohl T, et al. (1994) The *Bacillus subtilis* *pnbA* gene encoding p-nitrobenzyl esterase: cloning, sequence and high-level expression in *Escherichia coli*. *Gene* 151: 37–43.
- Harris RM, Webb DC, Howitt SM, Cox GB (2001) Characterization of PitA and PitB from *Escherichia coli*. *J Bacteriol* 183: 5008–5014.
- Xia G, Maier L, Sanchez-Carballo P, Li M, Otto M, et al. (2010) Glycosylation of wall teichoic acid in *Staphylococcus aureus* by TarM. *J Biol Chem* 285: 13405–13415.
- Brunskill EW, Bayles KW (1996) Identification and molecular characterization of a putative regulatory locus that affects autolysis in *Staphylococcus aureus*. *J Bacteriol* 178: 611–618.
- Sharma-Kuinkel BK, Mann EE, Ahn JS, Kuechenmeister LJ, Dunman PM, et al. (2009) The *Staphylococcus aureus* LytSR two-component regulatory system affects biofilm formation. *J Bacteriol* 191: 4767–4775.
- Dubrac S, Msadek T (2004) Identification of genes controlled by the essential YycG/YycF two-component system of *Staphylococcus aureus*. *J Bacteriol* 186: 1175–1181.
- Dubrac S, Boneca IG, Poupel O, Msadek T (2007) New insights into the WalK/WalR (YycG/YycF) essential signal transduction pathway reveal a major role in controlling cell wall metabolism and biofilm formation in *Staphylococcus aureus*. *J Bacteriol* 189: 8257–8269.
- Michel A, Agerer F, Hauck CR, Herrmann M, Ullrich J, et al. (2006) Global regulatory impact of ClpP protease of *Staphylococcus aureus* on regulons involved in virulence, oxidative stress response, autolysis, and DNA repair. *J Bacteriol* 188: 5783–5796.
- Jenssen H, Hamill P, Hancock RE (2006) Peptide antimicrobial agents. *Clin Microbiol Rev* 19: 491–511.
- Hancock RE, Sahl HG (2006) Antimicrobial and host-defense peptides as new anti-infective therapeutic strategies. *Nat Biotechnol* 24: 1551–1557.
- Horsburgh MJ, Wharton SJ, Cox AG, Ingham E, Peacock S, et al. (2002) MntR modulates expression of the PerR regulon and superoxide resistance in *Staphylococcus aureus* through control of manganese uptake. *Mol Microbiol* 44: 1269–1286.
- Tamber S, Reyes D, Donegan NP, Schwartzman JD, Cheung AL, et al. (2010) The *Staphylococcus aureus*-specific gene *rsr* represses *agr* and virulence in *Staphylococcus aureus*. *Infect Immun* 78: 4384–4391.
- Dubrac S, Bisicchia P, Devine KM, Msadek T (2008) A matter of life and death: cell wall homeostasis and the WalKR (YycGF) essential signal transduction pathway. *Mol Microbiol* 70: 1307–1322.
- Msadek T (1999) When the going gets tough: survival strategies and environmental signaling networks in *Bacillus subtilis*. *Trends Microbiol* 7: 201–207.
- Msadek T, Kunst F, Klier A, Rapoport G (1991) DegS-DegU and ComP-ComA modulator-effector pairs control expression of the *Bacillus subtilis* pleiotropic regulatory gene *degQ*. *J Bacteriol* 173: 2366–2377.
- Vergara-Irigaray M, Maira-Litran T, Merino N, Pier GB, Penades JR, et al. (2008) Wall teichoic acids are dispensable for anchoring the PNAG exopolysaccharide to the *Staphylococcus aureus* cell surface. *Microbiology* 154: 865–877.

55. Kreiswirth BN, Lofdahl S, Betley MJ, O'Reilly M, Schlievert PM, et al. (1983) The toxic shock syndrome exotoxin structural gene is not detectably transmitted by a prophage. *Nature* 305: 709–712.
56. Sambrook J, Fritsch EF, Maniatis T (1989) *Molecular cloning: a laboratory manual*, second edition. Harbor ColdSpring, ed. N. Y.: Cold Spring Harbor Laboratory.
57. Arnaud M, Chastanet A, Debarbouille M (2004) New vector for efficient allelic replacement in naturally nontransformable, low-GC-content, gram-positive bacteria. *Appl Environ Microbiol* 70: 6887–6891.
58. Archambaud C, Gouin E, Pizarro-Cerda J, Cossart P, Dussurget O (2005) Translation elongation factor EF-Tu is a target for Stp, a serine-threonine phosphatase involved in virulence of *Listeria monocytogenes*. *Mol Microbiol* 56: 383–396.
59. Agaisse H, Lereclus D (1994) Structural and functional analysis of the promoter region involved in full expression of the *cryIIIA* toxin gene of *Bacillus thuringiensis*. *Mol Microbiol* 13: 97–107.
60. Sullivan MA, Yasbin RE, Young FE (1984) New shuttle vectors for *Bacillus subtilis* and *Escherichia coli* which allow rapid detection of inserted fragments. *Gene* 29: 21–26.
61. Zuber P, Losick R (1983) Use of a *lacZ* fusion to study the role of the *spo0* genes of *Bacillus subtilis* in developmental regulation. *Cell* 35: 275–283.
62. Perkins JB, Youngman PJ (1986) Construction and properties of *Tn917-lac*, a transposon derivative that mediates transcriptional gene fusions in *Bacillus subtilis*. *Proc Natl Acad Sci U S A* 83: 140–144.
63. Joanne P, Falord M, Chesneau O, Lacombe C, Castano S, et al. (2009) Comparative study of two plasticins: specificity, interfacial behavior, and bactericidal activity. *Biochemistry* 48: 9372–9383.
64. Even S, Burguiere P, Auger S, Soutourina O, Danchin A, et al. (2006) Global control of cysteine metabolism by CymR in *Bacillus subtilis*. *J Bacteriol* 188: 2184–2197.
65. Chastanet A, Prudhomme M, Claverys JP, Msadek T (2001) Regulation of *Streptococcus pneumoniae* *clp* genes and their role in competence development and stress survival. *J Bacteriol* 183: 7295–7307.
66. Miller JH (1972) *Experiments in molecular genetics*. Cold Spring Harbor. N.Y.: Cold Spring Harbor Laboratory. pp 352–355.
67. Bradford M (1976) A rapid and sensitive method for the quantitation of microgram quantities of protein utilizing the principle of protein-dye binding. *Analytical Biochemistry* 72: 248–254.
68. Wernersson R, Nielsen HB (2005) OligoWiz 2.0—integrating sequence feature annotation into the design of microarray probes. *Nucleic Acids Res* 33: W611–615.
69. Gillaspay AF, Worrell V, Orvis J, Roe BA, Dyer DW, et al. (2006) The *Staphylococcus aureus* NCTC 8325 Genome. In: Fischetti VA, Novick RP, Ferretti JJ, Portnoy DA, Rood JJ, eds. *Gram-Positive Pathogens*. 2nd ed. WashingtonDC: ASM Press. pp 381–412.
70. Rasmussen S, Nielsen HB, Jarmer H (2009) The transcriptionally active regions in the genome of *Bacillus subtilis*. *Mol Microbiol* 73: 1043–1057.
71. Wei H, Kuan PF, Tian S, Yang C, Nie J, et al. (2008) A study of the relationships between oligonucleotide properties and hybridization signal intensities from NimbleGen microarray datasets. *Nucleic Acids Res* 36: 2926–2938.
