# Supplementary material for: Investigation of the Staphylococcus aureus GraSR Regulon Reveals Novel Links to Virulence, Stress Response and Cell Wall Signal Transduction Pathways
Source: PLoS One. 2011 Jul 1;6(7):e21323. doi: 10.1371/journal.pone.0021323 (PMC3128592; doi:10.1371/journal.pone.0021323)
Supplement: Table S1 — Genes positively controlled by GraSR. (XLS) [file pone.0021323.s003.xls]

## Sheet: Feuil1
Gene namea/synonym			Function/similarity	HG001/∆graRS transcription ratio	P-value
SAOUHSC_00006	SA0006	gyrA	DNA gyrase, A subunit	1.79624	1.44046e-09
SAOUHSC_00009	SA0009	serS	Seryl-tRNA synthetase	2.1165	2.64233e-14
SAOUHSC_00019	SA0016	purA	Adenylosuccinate synthetase	1.88589	9.54847e-11
SAOUHSC_00025	SA0022		HP similar to 5'nucleotidase cell wall anchored protein	2.92001	< 1.0E-16
SAOUHSC_00060*	SA0100		HP Similar to Na-Pi cotransporter family protein	2.45368	< 1.0E-16
SAOUHSC_00070	SA0108	sarS/sarH1	Staphylococcal accessory regulator A-like	2.73281	< 1.0E-16
SAOUHSC_00135	SA0165		HP	3.27706	< 1.0E-16
SAOUHSC_00136	SA0166		HP similar to ABC transporter ATP-binding protein	2.5203	< 1.0E-16
SAOUHSC_00137	SA0167		HP similar to sulfonate/nitrate/taurine transport system substrate-binding	2.01027	1.41287e-12
SAOUHSC_00138	SA0168		HP similar to sulfonate/nitrate/taurine transport system permease	2.1576	7.10543e-15
SAOUHSC_00139	SA0169		HP putative acyl-CoA dehydrogenase	2.3643	< 1.0E-16
SAOUHSC_00152	SA0181		HP similar to isochorismatase	1.82966	5.75607e-10
SAOUHSC_00153	SA0182	ipdC	Indole-3-pyruvate decarboxylase	2.17129	1.77636e-15
SAOUHSC_00155	SA0183	ptsG-glcA	PTS system, glucose-specific IIABC component	1.80807	1.53981e-09
SAOUHSC_00173	SA0204	acpD	Azoreductase	2.42668	< 1.0E-16
SAOUHSC_00182	SA0213		HP similar to isoprenylcysteine carboxyl methyltransferase (ICMT) family protein	3.43515	< 1.0E-16
SAOUHSC_00190	SA0220		Putative glycerophosphoryl diester phosphodiesterase	1.88626	1.23364e-10
SAOUHSC_00230	SA0250	lytS	Two-component sensor histidine kinase	1.99129	3.20877e-12
SAOUHSC_00231	SA0251	lytR	Two-component response regulator	1.97983	5.40035e-12
SAOUHSC_00244	SA0262		HP	1.94355	1.65248e-11
SAOUHSC_00256	SA0270		HP CHAP domain-containing protein	2.32954	< 1.0E-16
SAOUHSC_00272	SA0285		HP	2.3469	< 1.0E-16
SAOUHSC_00284	SA0295		HP similar to 5'-nucleotidase	2.55474	< 1.0E-16
SAOUHSC_00289			HP	2.70117	8.21165e-12
SAOUHSC_00300	SA0309	geh	Lipase precursor	4.68586	< 1.0E-16
SAOUHSC_00335	SA0341		HP	2.3013	< 1.0E-16
SAOUHSC_00347	SAS009		HP	2.0781	6.9722e-14
SAOUHSC_00350	SA0354	rpsR	30S ribosomal protein S18	1.91132	4.30226e-05
SAOUHSC_00358	SA0360		HP putative integral membrane protein	2.08556	1.28786e-14
SAOUHSC_00367	SA0368		HP similar to proton/sodium-glutamate symporter	2.18474	1.55431e-15
SAOUHSC_00372	SA0373	xpt-xprT	Xanthine phosphoribosyltransferase	2.45584	< 1.0E-16
SAOUHSC_00373	SA0374	pbuX	Xanthine permease	2.64728	< 1.0E-16
SAOUHSC_00374	SA0375	guaB	Inosine-5'-monophosphate dehydrogenase	2.40963	< 1.0E-16
SAOUHSC_00375	SA0376	guaA	GMP synthase	1.79009	2.78016e-09
SAOUHSC_00401	SA0395		HP	2.56215	< 1.0E-16
SAOUHSC_00427*	SA0423	sle1	N-acetylmuramoyl-L-alanine amidase	14.8933	< 1.0E-16
SAOUHSC_00435	SA0430	gltB-gltA	Glutamate synthase large subunit	1.9109	3.38216e-11
SAOUHSC_00436	SA0431	gltD	Glutamate synthase subunit beta	1.77818	3.64226e-09
SAOUHSC_00472*	SA0458	prs	Ribose-phosphate pyrophosphokinase	2.40199	< 1.0E-16
SAOUHSC_00473			HP	6.96579	< 1.0E-16
SAOUHSC_00499	SA0477	pdxS	Pyridoxal biosynthesis lyase	4.78905	< 1.0E-16
SAOUHSC_00500	SA0478	pdxT	Glutamine amidotransferase subunit	4.50348	< 1.0E-16
SAOUHSC_00501	SA0479	nupC	Putative pyrimidine nucleoside transport protein	2.49452	< 1.0E-16
SAOUHSC_00509	SA0486	gltX	Glutamyl-tRNA synthetase	2.04723	3.41949e-13
SAOUHSC_00523	SA0499		HP similar to methyltransferase	1.75337	2.0168e-08
SAOUHSC_00524	SA0500	rpoB	DNA-directed RNA polymerase subunit beta	2.04711	1.18794e-13
SAOUHSC_00525	SA0501	rpoC	DNA-directed RNA polymerase subunit beta'	2.28039	< 1.0E-16
SAOUHSC_00535	SA0511		HP similar to UDP-glucose 4-epimerase related protein	1.83065	6.87568e-10
SAOUHSC_00549	SA0524		HP putative GTP cyclohydrolase	1.90924	4.46523e-11
SAOUHSC_00550	SA0525		HP	1.91333	3.07538e-11
SAOUHSC_00551	SA0526		HP	1.91428	3.1295e-11
SAOUHSC_00582	SA0552		HP putative transcriptional regulator	2.10109	5.24025e-14
SAOUHSC_00630			HP	1.78291	5.07341e-09
SAOUHSC_00634	SA0587	mntC	Putative ABC transporter substrate-binding protein	3.93153	< 1.0E-16
SAOUHSC_00636	SA0588	mntB	Putative iron (chelated) ABC transporter permease	4.3091	< 1.0E-16
SAOUHSC_00637	SA0589	mntA	Putative manganese/iron ABC transporter ATP-binding protein	2.53791	< 1.0E-16
SAOUHSC_00669*¥	SA0618		HP similar to Pit family transporter	1.86266	2.44115e-10
SAOUHSC_00671*	SA0620		HP CHAP domain-containing protein	5.80718	< 1.0E-16
SAOUHSC_00674	SA0623	sarX	Staphylococcal accessory regulator protein X	3.06769	< 1.0E-16
SAOUHSC_00694	SA0641		HP similar to MarR-family transcriptional regulator	3.33569	< 1.0E-16
SAOUHSC_00704	SA0651		HP	2.98116	< 1.0E-16
SAOUHSC_00716	SA0662		HP similar to DoxX family protein	4.00324	< 1.0E-16
SAOUHSC_00717	SA0663		HP	4.06778	< 1.0E-16
SAOUHSC_00738*	SA0682		HP similar to di-tripeptide ABC transporter	1.8821	1.54826e-10
SAOUHSC_00741	SA0685	nrdI	Putative ribonucleotide reductase	2.1512	1.9984e-15
SAOUHSC_00742	SA0686	nrdE	Ribonucleoside-diphosphate reductase alpha subunit	2.49423	< 1.0E-16
SAOUHSC_00743	SA0687	nrdF	Ribonucleoside-diphosphate reductase beta subunit	2.02137	4.19886e-13
SAOUHSC_00764	SA0704		HP	2.05795	1.25899e-13
SAOUHSC_00808	SA0739		HP	1.82172	1.44886e-09
SAOUHSC_00819	SA0747	cspC	Cold-shock protein C	1.90252	1.18128e-13
SAOUHSC_00823	SAS018		HP	1.84438	1.45846e-10
SAOUHSC_00825	SA0751		HP	3.85136	< 1.0E-16
SAOUHSC_00836	SA0760	gcvH	Glycine cleavage system protein H	2.35273	< 1.0E-16
SAOUHSC_00867¥			HP	2.71154	< 1.0E-16
SAOUHSC_00868¥	SA0792	dltX	HP	1.9571	1.03959e-11
SAOUHSC_00869¥	SA0793	dltA	D-alanine-D-alanyl carrier protein ligase	2.30941	< 1.0E-16
SAOUHSC_00871¥	SA0795	dltC	D-alanine carrier protein	1.95012	1.78491e-11
SAOUHSC_00872¥	SA0796	dltD	D-alanine-activating enzyme/transfer protein	2.13809	1.37668e-14
SAOUHSC_00933	SA0855	trpS	Tryptophanyl-tRNA synthetase	2.15751	1.55431e-15
SAOUHSC_00948	SA0870		HP	2.03769	2.74225e-13
SAOUHSC_00966			HP	1.77019	1.51327e-09
SAOUHSC_00974¥		tarM	wall teichoic acids GlcNAc-transferase	1.75305	1.16677e-08
SAOUHSC_00975	SA0890		HP similar to DoxX family protein	6.32439	< 1.0E-16
SAOUHSC_00994*	SA0905	atlA	Bifunctional autolysin	3.96627	< 1.0E-16
SAOUHSC_00999¥	SA0910	qoxD	Quinol oxidase, subunit IV	4.0202	< 1.0E-16
SAOUHSC_01000¥	SA0911	qoxC	Cytochrome c oxidase subunit III	3.45788	< 1.0E-16
SAOUHSC_01001¥	SA0912	qoxB	Quinol oxidase subunit I	4.34042	< 1.0E-16
SAOUHSC_01002*¥	SA0913	qoxA	Quinol oxidase AA3 subunit II	6.90653	< 1.0E-16
SAOUHSC_01008	SA0916	purE	Phosphoribosylaminoimidazole carboxylase catalytic subunit	3.63759	< 1.0E-16
SAOUHSC_01009	SA0917	purK	Phosphoribosylaminoimidazole carboxylase ATPase subunit	1.98591	4.2244e-12
SAOUHSC_01010	SA0918	purC	Phosphoribosylaminoimidazole-succinocarboxamide synthase	2.18418	2.88658e-15
SAOUHSC_01011	SA0919	purS	Phosphoribosylformylglycinamidine synthase	3.73586	< 1.0E-16
SAOUHSC_01012	SA0920	purQ	Phosphoribosylformylglycinamidine synthase I	4.69342	< 1.0E-16
SAOUHSC_01013	SA0921	purL	Phosphoribosylformylglycinamidine synthase II	5.94179	< 1.0E-16
SAOUHSC_01014	SA0922	purF	Amidophosphoribosyltransferase	5.14868	< 1.0E-16
SAOUHSC_01015	SA0923	purM	Phosphoribosylaminoimidazole synthetase	3.40445	< 1.0E-16
SAOUHSC_01016	SA0924	purN	Phosphoribosylglycinamide formyltransferase	2.55036	< 1.0E-16
SAOUHSC_01017	SA0925	purH	Bifunctional purine biosynthesis protein	2.9537	< 1.0E-16
SAOUHSC_01018	SA0926	purD	Phosphoribosylamine-glycine ligase	2.89019	< 1.0E-16
SAOUHSC_01042	SA0945	pdhE	Branched-chain alpha-keto acid dehydrogenase subunit E2	1.77976	2.17349e-09
SAOUHSC_01043	SA0946	pdhD-lpdA	Dihydrolipoamide dehydrogenase	1.9969	1.07425e-12
SAOUHSC_01057			HP	2.79948	1.16152e-11
SAOUHSC_01058	SA0959	typA	GTP-binding protein	2.03603	1.251e-12
SAOUHSC_01092	SA0985	pheS	Phenylalanyl-tRNA synthetase subunit alpha	1.92579	3.2871e-11
SAOUHSC_01103	SA0994	sdhC	Succinate dehydrogenase cytochrome b-558 subunit	1.80664	2.66454e-15
SAOUHSC_01104	SA0995	sdhA	Succinate dehydrogenase flavoprotein subunit	1.89344	3.73059e-11
SAOUHSC_01105	SA0996	sdhB	Succinate dehydrogenase iron-sulfur subunit	1.79863	1.99102e-09
SAOUHSC_01110	SA1000		Putative fibrinogen-binding protein	8.53596	< 1.0E-16
SAOUHSC_01114	SA1003	efb	Fibrinogen-binding protein	1.85744	4.59061e-10
SAOUHSC_01121	SA1007	hla	Alpha-haemolysin	2.48866	< 1.0E-16
SAOUHSC_01135			HP SLUSH-like haemolytic protein	44.6246	< 1.0E-16
SAOUHSC_01136			HP SLUSH-like haemolytic protein	98.4205	< 1.0E-16
SAOUHSC_01200			HP	3.91308	< 1.0E-16
SAOUHSC_01209	SA1082	rimM	16S rRNA-processing protein	2.04578	3.9746e-13
SAOUHSC_01210	SA1083	trmD	tRNA (guanine-N(1)-)-methyltransferase	1.89929	6.05338e-11
SAOUHSC_01287	SA1150	glnA	Glutamine synthetase type I	1.90788	5.12741e-11
SAOUHSC_01309			HP	2.75369	< 1.0E-16
SAOUHSC_01315	SAS041		HP	1.88065	1.46968e-10
SAOUHSC_01330	SA1172	guaC	Guanosine 5'-monophosphate oxidoreductase	1.87819	3.21817e-10
SAOUHSC_01344			HP	2.64095	< 1.0E-16
SAOUHSC_01353			HP	3.85923	< 1.0E-16
SAOUHSC_01359¥	SA1193	mprF	Phosphatidylglycerol lysyltransferase	2.79399	< 1.0E-16
SAOUHSC_01392	SA1224		HP putative ABC transporter ATP-binding protein	2.15039	1.04361e-14
SAOUHSC_01403	SA1234	cspA	Cold shock protein	1.87834	1.13344e-10
SAOUHSC_01404			HP	2.50104	1.24038e-10
SAOUHSC_01471	SA1287	asnC	Asparaginyl-tRNA synthetase	1.77239	6.5083e-09
SAOUHSC_01491	SA1306	gpsA	NAD(P)H-dependent glycerol-3-phosphate dehydrogenase	1.82876	3.89433e-10
SAOUHSC_01495			HP	2.10505	3.44169e-14
SAOUHSC_01598	SA1335		HP similar to ribonuclease Z	2.01576	7.01883e-13
SAOUHSC_01608			HP	1.98572	2.05214e-12
SAOUHSC_01658	SA1386		Putative endonuclease IV	2.04388	4.1056e-13
SAOUHSC_01659	SA1387		Putative ATP-dependent RNA helicase	2.0841	1.08358e-13
SAOUHSC_01730	SA1452	csbD	Sigma-B mediated bacterial general stress response protein	2.14664	< 1.0E-16
SAOUHSC_01733			HP	2.09073	9.76996e-14
SAOUHSC_01773	SA1493	hemD	Uroporphyrinogen III synthase	1.89737	8.05109e-11
SAOUHSC_01784	SA1502	rplT	50S ribosomal protein L20	2.09423	3.9968e-14
SAOUHSC_01785	SA1503	rpmI	50S ribosomal protein L35	2.18954	1.9984e-15
SAOUHSC_01786	SA1504	infC	Translation initiation factor IF-3	2.43223	< 1.0E-16
SAOUHSC_01788	SA1506	thrS	Threonyl-tRNA synthetase	1.82568	6.66548e-10
SAOUHSC_01820	SA1533	ackA	Acetate kinase	2.80372	< 1.0E-16
SAOUHSC_01836	SA1547	ptaA	PTS system N-acetylglucosamine-specific IIABC component	1.88761	1.17796e-10
SAOUHSC_01837	SA1548		HP Similar to 1-acyl-sn-glycerol-3-phosphate acyltransferase	1.80977	1.73871e-09
SAOUHSC_01845	SA1553	fhs	Formate-tetrahydrofolate ligase	1.96997	3.49232e-12
SAOUHSC_01866	SA1570		HP Similar to aminoglycoside resistance associated protein	1.84509	5.96473e-10
SAOUHSC_01891	SA1591	arsR	Arsenical resistance operon repressor	1.84609	5.60428e-10
SAOUHSC_01953		epiA	Lantibiotic epidermin precursor EpiA	3.22022	< 1.0E-16
SAOUHSC_01979	SA1665		HP similar to regulatory protein	2.3408	< 1.0E-16
SAOUHSC_02043			Putative phage head protein	1.9107	6.94471e-11
SAOUHSC_02044			HP phage-like protein	2.1523	7.32747e-15
SAOUHSC_02097	SA1699		HP similar to BN-like ribonuclease	1.87212	1.37587e-10
SAOUHSC_02134	SA1730		Putative nitric oxide synthase oxygenase subunit	1.93737	1.68736e-11
SAOUHSC_02163	SA1752	hlb	Beta-haemolysin	2.77699	5.0989e-11
SAOUHSC_02167	SA1754		HP Similar to complement inhibitor protein SCIN	2.75984	< 1.0E-16
SAOUHSC_02169	SA1755	chs-chp	Chemotaxis-inhibiting protein CHIPS	2.36234	< 1.0E-16
SAOUHSC_02176	SAS059		HP	1.8748	3.59173e-11
SAOUHSC_02257¥	SA1839	sdrH	Atypical serine-aspartate rich (sdr) protein	1.86373	2.83539e-10
SAOUHSC_02260	SAS065	hld	Delta-haemolysin	80.0655	< 1.0E-16
SAOUHSC_02261	SA1842	agrB	Accessory gene regulator protein B	21.6165	< 1.0E-16
SAOUHSC_02262	SAS066	agrD	Accessory gene regulator protein D	20.9547	< 1.0E-16
SAOUHSC_02264	SA1843	agrC	Accessory gene regulator protein C	9.34966	< 1.0E-16
SAOUHSC_02265	SA1844	agrA	Accessory gene regulator protein A	4.16944	< 1.0E-16
SAOUHSC_02266			HP	2.67699	< 1.0E-16
SAOUHSC_02278	SA1855	riml	Ribosomal-protein-alanine acetyltransferase	1.86361	2.43009e-10
SAOUHSC_02279	SA1856		HP similar to glycoprotein endopeptidase	1.79031	3.22846e-09
SAOUHSC_02290			HP	2.08462	4.31655e-13
SAOUHSC_02304	SAS067		Putative antitoxin, mazEF toxin/antitoxin module	1.97007	1.32738e-11
SAOUHSC_02316	SA1885		HP similar to ATP-dependent RNA helicase	1.9874	2.08678e-12
SAOUHSC_02333*	SA1898	sceD	Transglycosylase	4.91316	< 1.0E-16
SAOUHSC_02358	SA1919		HP similar to HemK family modification methylase	2.40605	< 1.0E-16
SAOUHSC_02359	SA1920	prfA	Peptide chain release factor 1	2.83266	< 1.0E-16
SAOUHSC_02360	SA1921	tdk	Thymidine kinase	2.53489	< 1.0E-16
SAOUHSC_02384	SA1944		HP putative integral membrane protein	1.78586	4.58499e-09
SAOUHSC_02385*	SA1945	manA	Mannose-6-phosphate isomerase	1.91622	1.89402e-11
SAOUHSC_02388	SA1947	czrA	Metal-dependent transcriptional regulator	1.77365	7.30561e-09
SAOUHSC_02412			HP	2.6006	< 1.0E-16
SAOUHSC_02468	SA2008	alsS	Acetolactate synthase	1.95449	1.08435e-11
SAOUHSC_02482	SA2020	cbiO	Cobalt transporter ATP-binding subunit	1.77966	5.56535e-09
SAOUHSC_02484	SA2022	rplQ	50S ribosomal protein L17	1.90456	7.40266e-11
SAOUHSC_02485	SA2023	rpoA	DNA-directed RNA polymerase subunit alpha	1.93587	3.22009e-11
SAOUHSC_02490	SA2027	adk	Adenylate kinase	1.76394	4.26102e-09
SAOUHSC_02494¥	SA2031	rpsE	30S ribosomal protein S5	1.89287	6.40361e-11
SAOUHSC_02495¥	SA2032	rplR	50S ribosomal protein L18	1.8687	1.08051e-10
SAOUHSC_02496¥	SA2033	rplF	50S ribosomal protein L6	2.11705	3.70814e-14
SAOUHSC_02498¥	SA2034	rpsH	30S ribosomal protein S8	2.03227	7.26308e-13
SAOUHSC_02499¥	SAS079	rpsN	30S ribosomal protein S14	2.252	6.66134e-16
SAOUHSC_02500¥	SA2035	rplE	50S ribosomal protein L5	1.83205	6.43297e-10
SAOUHSC_02501	SA2036	rplX	50S ribosomal protein L24	1.75288	1.19922e-08
SAOUHSC_02502	SA2037	rplN	50S ribosomal protein L14	1.80544	2.3251e-09
SAOUHSC_02503	SA2038	rpsQ	30S ribosomal protein S17	1.97349	4.46843e-12
SAOUHSC_02504	SA2039	rpmC	50S ribosomal protein L29	1.92252	2.19442e-11
SAOUHSC_02505	SA2040	rplP	50S ribosomal protein L16	2.10222	8.52651e-14
SAOUHSC_02506	SA2041	rpsC	30S ribosomal protein S3	2.05785	3.83249e-13
SAOUHSC_02507	SA2042	rplV	50S ribosomal protein L22	1.89683	1.01893e-10
SAOUHSC_02508	SA2043	rpsS	30S ribosomal protein S19	1.79574	2.43067e-09
SAOUHSC_02509	SA2044	rplB	50S ribosomal protein L2	1.77635	4.91903e-09
SAOUHSC_02510	SA2045	rplW	50S ribosomal protein L23	1.79008	3.07173e-09
SAOUHSC_02511	SA2046	rplD	50S ribosomal protein L4	1.92678	2.17697e-11
SAOUHSC_02512	SA2047	rplC	50S ribosomal protein L3	1.75348	9.90633e-09
SAOUHSC_02516	SA2050		HP similar major facilitator transporter permease	3.575	< 1.0E-16
SAOUHSC_02521			HP	3.37025	< 1.0E-16
SAOUHSC_02566	SA2089	sarR	Staphylococcal accessory regulator R	3.35314	< 1.0E-16
SAOUHSC_02571*¥	SA2093	ssaA	Secretory antigen SsaA precursor	7.9851	< 1.0E-16
SAOUHSC_02575	SA2096		HP	2.90411	< 1.0E-16
SAOUHSC_02576*	SA2097		HP CHAP domain-containing protein	18.2243	< 1.0E-16
SAOUHSC_02602			HP	1.88603	1.64596e-10
SAOUHSC_02611	SA2126		HP similar to lysostaphin resistance protein A	3.72463	< 1.0E-16
SAOUHSC_02629	SA2142		Putative EmrB/QacA family drug resistance transporter	1.81899	1.1648e-09
SAOUHSC_02630	SA2143		HP similar to multidrug resistance protein A	1.8638	3.41769e-10
SAOUHSC_02698	SA2201		Putative amino acid ABC transporter permease	2.06343	3.59712e-14
SAOUHSC_02699	SA2202		Putative amino acid ABC transporter ATP-binding protein	1.93955	4.38805e-12
SAOUHSC_02706	SA2206	sbi	Immunoglobulin G-binding protein	1.82026	2.76826e-09
SAOUHSC_02733	SA2229		HP similar to amino acid permesae	1.82814	1.38108e-09
SAOUHSC_02738			HP	1.75182	1.47613e-08
SAOUHSC_02773	SA2261		Putative aminobenzoyl-glutamate transporter	2.06142	2.85549e-13
SAOUHSC_02801	SA2288	gtaB-galU	UTP-glucose-1-phosphate uridyltransferase	1.81069	1.6012e-09
SAOUHSC_02849	SA2327	cidC	Pyruvate oxidase	1.80388	2.11194e-09
SAOUHSC_02855	SA2332		HP CHAP domain-containing protein	15.6038	< 1.0E-16
SAOUHSC_02866	SA2339		HP similar to drug exporter of the RND superfamily	2.08971	8.92619e-14
SAOUHSC_02867	SA2340		HP similar to TetR-family transcriptional regulator	1.78333	4.88461e-09
SAOUHSC_02883*	SA2353		HP CHAP domain-containing protein	2.17915	3.10862e-15
SAOUHSC_02887*	SA2356	isaA	Immunodominant antigen A	5.48494	< 1.0E-16
SAOUHSC_02909	SA2375	pyrD	Dihydroorotate dehydrogenase 2	2.36257	< 1.0E-16
SAOUHSC_02960			HP	3.7248	< 1.0E-16
SAOUHSC_02963	SA2423	clfB	Clumping factor ClfB	2.26983	2.22045e-16
SAOUHSC_02990*	SA2447		HP similar to cell wall anchored serine-rich repeat-containing protein	2.26172	2.22045e-16
SAOUHSC_03045	SA2494	cspB	Cold shock protein CspB	2.28571	< 1.0E-16
SAOUHSC_A00219			HP	1.9379	4.48641e-11
SAOUHSC_A00332			HP	3.40691	< 1.0E-16
SAOUHSC_A00354	SAS011		HP	2.67723	< 1.0E-16
SAOUHSC_A01041			HP	4.63228	< 1.0E-16
SAOUHSC_A01909			HP	4.97553	< 1.0E-16
SAOUHSC_A01910			HP	4.99935	< 1.0E-16
SAOUHSC_A02445			HP	2.38788	< 1.0E-16
a Gene numbers SAOUHSC_ and SA correspond to S. aureus NCTC 8325 and N315 strain genomic sequence respectively (http://gib.genes.nig.ac.jp/single/main.php?spid=Saur_NCTC8325, http://genolist.pasteur.fr/AureoList/index.html).
* Genes known or predicted to be regulated by the WalKR system
¥ Genes identified as GraSR regulon members (Table 2).
