# Supplementary material for: Investigation of the Staphylococcus aureus GraSR Regulon Reveals Novel Links to Virulence, Stress Response and Cell Wall Signal Transduction Pathways
Source: PLoS One. 2011 Jul 1;6(7):e21323. doi: 10.1371/journal.pone.0021323 (PMC3128592; doi:10.1371/journal.pone.0021323)
Supplement: Table S2 — Genes negatively controlled by GraSR. (XLS) [file pone.0021323.s004.xls]

## Sheet: Feuil1
Gene namea/synonym			function/similarity	HG001/∆graRS transcription ratio	P-value
SAOUHSC_00086	SA0122	butA	Acetoin reductase	0.306782	< 1.0E-16
SAOUHSC_00146¥	SA0175		HP putative integral membrane protein	0.149397	< 1.0E-16
SAOUHSC_00174	SA0205		HP M23/M37 peptidase domain-containing protein	0.0835133	< 1.0E-16
SAOUHSC_00206	SA0232	ldh1	L-lactate dehydrogenase	0.023895	< 1.0E-16
SAOUHSC_00212			HP	0.510841	5.84333e-12
SAOUHSC_00246	SA0263		HP similar to drug transporter	0.408248	< 1.0E-16
SAOUHSC_00281	SA0293	nirC	Putative formate/nitrite transporter	0.103254	< 1.0E-16
SAOUHSC_00282	SA0294	brnQ	Putative branched-chain amino acid:cation transporter	0.406586	< 1.0E-16
SAOUHSC_00412*	SA0411	ndhF	NADH dehydrogenase subunit 5	0.211919	< 1.0E-16
SAOUHSC_00413	SA0412		HP	0.251594	< 1.0E-16
SAOUHSC_00414	SA0413		HP	0.408019	< 1.0E-16
SAOUHSC_00416	SA0415		HP similar to PAP2 superfamily phosphatase	0.347883	< 1.0E-16
SAOUHSC_00417	SA0416	yvaK	Putative carboxylesterase	0.495784	1.00542e-12
SAOUHSC_00420	SA0417		HP putative sodium-dependent symporter protein	0.0586463	< 1.0E-16
SAOUHSC_00431	SA0427		HP similar to integral membrane protein	0.432721	< 1.0E-16
SAOUHSC_00433	SA0428		HP putative integral membrane protein	0.422327	< 1.0E-16
SAOUHSC_00481	SA0464		HP similar to ribosome-associated heat shock protein	0.53186	2.22045e-13
SAOUHSC_00482	SA0465	divIC	Putative cell-division initiation protein	0.469402	< 1.0E-16
SAOUHSC_00485	SA0468	hpt	Hypoxanthine-guanine phosphoribosyltransferase	0.486054	3.10862e-15
SAOUHSC_00502	SA0480	ctsR	Stress response regulator	0.116741	< 1.0E-16
SAOUHSC_00503	SA0481		HP UvrB/UvrC motif-containing protein	0.108521	< 1.0E-16
SAOUHSC_00504	SA0482		HP similar to ATP guanido phosphotransferase	0.128924	< 1.0E-16
SAOUHSC_00505	SA0483	clpC	ATP-dependent Clp protease ATP-binding subunit ClpC	0.134342	< 1.0E-16
SAOUHSC_00557	SA0533	vraA	Long chain fatty acid CoA ligase	0.506249	5.73874e-12
SAOUHSC_00558	SA0534	vraB	Acetyl-CoA acetyltransferase	0.441423	2.22045e-16
SAOUHSC_00561	SAS016		HP	0.494079	9.86766e-13
SAOUHSC_00617*	SA0570		HP	0.439711	< 1.0E-16
SAOUHSC_00618	SA0571		HP putative integral membrane protein	0.546986	2.56647e-09
SAOUHSC_00639	SA0591		HP putative integral membrane protein	0.246328	< 1.0E-16
SAOUHSC_00652	SA0602	fhuA	Iron compound ABC transporter ATP-binding protein	0.494129	3.38396e-12
SAOUHSC_00653	SA0603	fhuB	Ferrichrome ABC transporter permease	0.429343	< 1.0E-16
SAOUHSC_00654	SA0604	fhuG	Ferrichrome ABC transporter permease	0.502377	5.94991e-12
SAOUHSC_00661	SA0610	lipA	Lipase	0.507927	0.000350481
SAOUHSC_00663	SA0612		Putative GNAT family acetyltransferase	0.552694	3.15138e-09
SAOUHSC_00718	SA0664		HP	0.503264	7.19469e-12
SAOUHSC_00728*	SA0674		HP similar to membrane sulfatase	0.49548	8.65974e-15
SAOUHSC_00762	SA0702	llm	Lipophilic protein affecting bacterial lysis rate and methicillin resistance level	0.490231	4.71401e-13
SAOUHSC_00767	SA0707	yfiA	Ribosomal subunit interface protein; putative sigma-54 modulation protein	0.255698	< 1.0E-16
SAOUHSC_00785	SA0719	trxB	Thioredoxine reductase	0.513714	2.6912e-11
SAOUHSC_00790	SA0723	clpP	ATP-dependent Clp protease proteolytic subunit	0.264951	< 1.0E-16
SAOUHSC_00826	SA0752		HP	0.535847	4.38954e-10
SAOUHSC_00828	SA0753		HP similar to LysE family L-lysine exporter	0.480171	2.26485e-13
SAOUHSC_00831	SA0755		HP similar to OsmC-like organic hydroperoxide resistance protein	0.421011	< 1.0E-16
SAOUHSC_00846	SA0773		HP putative integral membrane protein	0.48005	2.04947e-13
SAOUHSC_00880	SA0804		HP similar to Na+/H+ antiporter, NhaC family	0.0928038	< 1.0E-16
SAOUHSC_00881	SA0805		HP similar to thioesterase	0.307183	< 1.0E-16
SAOUHSC_00882¥	SA0806		HP	0.45557	2.66454e-15
SAOUHSC_00898	SA0821	argH	Argininosuccinate lyase	0.554077	1.93729e-09
SAOUHSC_00899	SA0822	argG	Argininosuccinate synthase	0.50038	2.1505e-12
SAOUHSC_00901	SA0824		HP	0.491486	2.41762e-12
SAOUHSC_00912	SA0835	clpB	ATP-dependent Clp protease, ATP-binding subunit ClpB	0.0623722	< 1.0E-16
SAOUHSC_00932	SA0854	oppC	Oligopeptide ABC transporter permease	0.493889	2.31482e-12
SAOUHSC_00938	SA0860	yjbM	Putative GTP pyrophosphokinase	0.531498	3.19882e-10
SAOUHSC_00939	SA0861		HP	0.545747	1.5668e-09
SAOUHSC_00949	SA0871		HP similar to alanine or glycine:cation symporter	0.475482	5.26246e-14
SAOUHSC_00962	SA0883		HP	0.261666	< 1.0E-16
SAOUHSC_00976	SA0891		HP similar to iron ABC transporter ATP-binding protein	0.500842	7.04325e-12
SAOUHSC_00991¥	SA0903		HP similar to acyltransferase	0.406371	< 1.0E-16
SAOUHSC_00998	SA0909	fmtA-fmt	Autolysis and methicillin resistant-related protein	0.509799	2.37297e-11
SAOUHSC_01005	SA0914		HP	0.360902	< 1.0E-16
SAOUHSC_01024	SAS030		HP	0.194937	< 1.0E-16
SAOUHSC_01063	SA0962		HP similar to FtsW/RodA/SpoVE family cell division protein	0.491789	1.02784e-12
SAOUHSC_01122			HP	0.530671	8.90559e-11
SAOUHSC_01133	SA1016	eta	Exfoliative toxin A	0.407298	< 1.0E-16
SAOUHSC_01138	SA1019		HP similar to GNAT family acetyltransferase	0.417057	< 1.0E-16
SAOUHSC_01160	SA1037		HP similar to Glyoxalase/Bleomycin resistance protein/Dioxygenase superfamily	0.481296	2.61346e-13
SAOUHSC_01173	SA1049		HP	0.3968	< 1.0E-16
SAOUHSC_01264	SAS037		HP	0.440099	< 1.0E-16
SAOUHSC_01278	SA1142	glpD	Aerobic glycerol-3-phosphate dehydrogenase	0.212839	< 1.0E-16
SAOUHSC_01317	SA1161		HP	0.433019	< 1.0E-16
SAOUHSC_01319	SA1163	thrA	Aspartate kinase	0.528871	1.14221e-10
SAOUHSC_01320	SA1164	dhoM	Homoserine dehydrogenase	0.331538	< 1.0E-16
SAOUHSC_01321	SA1165	thrC	Threonine synthase	0.437848	< 1.0E-16
SAOUHSC_01329	SA1171	rpsN	30S ribosomal protein S14	0.349441	< 1.0E-16
SAOUHSC_01361	SA1195	msrR	Peptide methionine sulfoxide reductase regulator	0.368819	< 1.0E-16
SAOUHSC_01382	SA1215		HP putative membrane protein	0.329664	< 1.0E-16
SAOUHSC_01394	SA1225	lysC	Aspartate kinase	0.230976	< 1.0E-16
SAOUHSC_01395	SA1226	asd	Aspartate semialdehyde dehydrogenase	0.238399	< 1.0E-16
SAOUHSC_01396	SA1227	dapA	Dihydrodipicolinate synthase	0.237117	< 1.0E-16
SAOUHSC_01397	SA1228	dapB	Dihydrodipicolinate reductase	0.244725	< 1.0E-16
SAOUHSC_01398	SA1229	dapD	Tetrahydrodipicolinate acetyltransferase	0.240539	< 1.0E-16
SAOUHSC_01399	SA1230		Putative hippurate hydrolase	0.337112	< 1.0E-16
SAOUHSC_01400	SA1231	alr	Alanine racemase	0.364966	< 1.0E-16
SAOUHSC_01401	SA1232	lysA	Diaminopimelate decarboxylase	0.474402	5.39568e-14
SAOUHSC_01405	SA1235		HP	0.490207	1.34537e-12
SAOUHSC_01406	SA1236		Putative acylphosphatase	0.3983	< 1.0E-16
SAOUHSC_01429	SA1254		HP (DUF1250)	0.377285	< 1.0E-16
SAOUHSC_01430	SA1255	crr	Phosphotransferase system enzyme IIA	0.340264	< 1.0E-16
SAOUHSC_01431	SA1256	msrB	Methionine sulfoxide reductase B	0.26322	< 1.0E-16
SAOUHSC_01432	SA1257	msrA2	Methionine sulfoxide reductase A	0.202089	< 1.0E-16
SAOUHSC_01443	SA1266		HP similar to ribonuclease H	0.320852	< 1.0E-16
SAOUHSC_01464	SA1281		HP	0.386039	1.8068e-10
SAOUHSC_01480	SA1296		HP	0.540906	1.25651e-09
SAOUHSC_01502	SA1313		Putative ATP-dependent DNA helicase RecQ	0.439142	2.22045e-16
SAOUHSC_01504	SA1315	fer	Ferredoxin	0.551296	3.52547e-09
SAOUHSC_01505	SA1316		HP similar to riboflavin transporter	0.530568	1.9676e-10
SAOUHSC_01617	SA1351	argR	Arginine repressor	0.495051	1.38689e-12
SAOUHSC_01681	SA1407	prmA	Ribosomal protein L11 methyltransferase	0.284053	< 1.0E-16
SAOUHSC_01682	SA1408	dnaJ	Chaperone protein DnaJ	0.267925	< 1.0E-16
SAOUHSC_01683	SA1409	dnaK	Molecular chaperone DnaK	0.0967351	< 1.0E-16
SAOUHSC_01685	SA1411	hrcA	Heat-inducible transcription repressor	0.0620004	< 1.0E-16
SAOUHSC_01748	SA1465	tgt	Queuine tRNA-ribosyltransferase	0.49025	1.394e-12
SAOUHSC_01760			HP	0.277368	< 1.0E-16
SAOUHSC_01761	SA1476		HP	0.160224	< 1.0E-16
SAOUHSC_01780			HP	0.419719	< 1.0E-16
SAOUHSC_01787	SA1505	lysP	Lysine-specific permease	0.438209	4.44089e-16
SAOUHSC_01795	SA1511	coaE	Dephospho-CoA kinase	0.528769	1.22985e-10
SAOUHSC_01800*	SA1516	phoP	Alkaline phosphatase synthesis transcriptional regulatory protein	0.413	< 1.0E-16
SAOUHSC_01838	SA1549		HP similar to serine protease HtrA	0.203606	< 1.0E-16
SAOUHSC_01887	SA1587	ribBA	Riboflavin biosynthesis protein	0.546924	1.61282e-09
SAOUHSC_01896	SA1594		HP	0.443618	3.20108e-08
SAOUHSC_01966	SA1654		HP similar to ABC transporter permease EcsB-like	0.476088	6.95e-14
SAOUHSC_01972	SA1659	prsA	Protein export	0.240986	< 1.0E-16
SAOUHSC_01998	SA1679		HP similar to D-3-phosphoglycerate dehydrogenase	0.549241	3.21521e-12
SAOUHSC_02006	SA1686		HP	0.486998	6.70131e-13
SAOUHSC_02012	SA1691	sgtB	Glycosyltransferase	0.316154	< 1.0E-16
SAOUHSC_02098	SA1700	vraR	DNA-binding response regulator	0.365552	< 1.0E-16
SAOUHSC_02099	SA1701	vraS	Histidine kinase	0.260245	< 1.0E-16
SAOUHSC_02100	SA1702		HP similar to integral membrane protein	0.314135	< 1.0E-16
SAOUHSC_02101	SA1703		HP	0.388687	3.27634e-10
SAOUHSC_02110	SA1710		HP similar to exonuclease	0.524639	7.74429e-11
SAOUHSC_02111	SA1711		HP similar to DNA polymerase IV	0.520903	8.74143e-11
SAOUHSC_02112	SA1712		HP similar to integral membrane protein	0.346467	< 1.0E-16
SAOUHSC_02125	SA1723		HP similar to TrpR-like repressor	0.505194	8.79341e-12
SAOUHSC_02129	SA1726		HP similar to cysteine protease inhibitor	0.273712	< 1.0E-16
SAOUHSC_02254	SA1836	groEL	Chaperonin GroEL	0.163912	< 1.0E-16
SAOUHSC_02255	SA1837	groES	Co-chaperonin GroES	0.144861	< 1.0E-16
SAOUHSC_02281	SA1858	ilvD	Dihydroxy-acid dehydratase	0.390423	< 1.0E-16
SAOUHSC_02365	SA1926	murZ	UDP-N-acetylglucosamine 1-carboxyvinyltransferase	0.516711	4.2125e-11
SAOUHSC_02373	SA1934		HP	0.496525	2.42983e-12
SAOUHSC_02374	SA1935	hmrA	Peptidase	0.447657	4.44089e-16
SAOUHSC_02426	SA1976		HP similar to transporter gate domain-containing protein	0.413381	< 1.0E-16
SAOUHSC_02427	SA1977	htsC	Heme ABC type transporter permease HtsC	0.51329	1.68197e-11
SAOUHSC_02428	SA1978	htsB	Heme ABC type transporter permease HtsB	0.539976	8.78108e-10
SAOUHSC_02435	SA1982		HP similar major facilitator transporter	0.348319	< 1.0E-16
SAOUHSC_02448	SA1990		HP similar to cell surface hydrolase	0.529394	1.83441e-10
SAOUHSC_02515	SA2049		HP similar to integral membrane protein	0.557383	8.23169e-09
SAOUHSC_02528	SA2058		HP similar to integral membrane protein	0.550702	9.90634e-09
SAOUHSC_02551	SA2076		HP similar to GNAT family acetyltransferase	0.546505	1.54204e-09
SAOUHSC_02552	SA2077		HP similar to biotin transport protein BioY	0.383299	< 1.0E-16
SAOUHSC_02568	SA2090	rsr	Putative transcriptional repressor	0.379782	< 1.0E-16
SAOUHSC_02583	SA2103		HP similar to transcription attenuator LytR	0.467847	2.95319e-14
SAOUHSC_02596	SA2113		HP	0.41618	< 1.0E-16
SAOUHSC_02603*	SA2118		HP similar to integral membrane protein	0.525065	1.2761e-10
SAOUHSC_02637	SA2147	tcaR	Transcriptional regulator	0.551337	1.8026e-09
SAOUHSC_02638	SA2148		HP similar to integral membrane protein	0.528595	3.30151e-10
SAOUHSC_02645	SA2153		HP similar to response regulator of the LytR/AlgR family	0.526759	3.3972e-10
SAOUHSC_02646	SA2154		HP	0.493266	3.09375e-12
SAOUHSC_02648	SA2156	lldP2	L-lactate permease 2	0.139433	< 1.0E-16
SAOUHSC_02652	SA2160		HP smilar to zinc dependent alcohol dehydrogenase	0.541782	3.72307e-10
SAOUHSC_02653	SA2161		HP similar to GNAT family acetyltransferase	0.543791	1.05159e-09
SAOUHSC_02663	SA2168		HP	0.550177	4.44513e-09
SAOUHSC_02666	SA2171		HP	0.421586	< 1.0E-16
SAOUHSC_02670	SA2175		HP similar to small heat shock protein Hsp20	0.432319	< 1.0E-16
SAOUHSC_02682	SA2186		Putative uroporphyrin-III C-methyltransferase	0.492061	9.83436e-13
SAOUHSC_02683	SA2187	nirD	Nitrite reductase small subunit	0.463767	1.24345e-14
SAOUHSC_02702			HP	0.435132	< 1.0E-16
SAOUHSC_02704	SA2205		Putative cation efflux family protein	0.477543	2.64011e-13
SAOUHSC_02711	SA2210		HP similar to integral membrane protein	0.534792	1.72051e-10
SAOUHSC_02716	SA2215	bioD	Dethiobiotin synthase	0.529221	3.10861e-10
SAOUHSC_02722	SA2219		HP similar to GtrA family cell surface polysaccharides synthase	0.514168	1.71745e-11
SAOUHSC_02724	SA2221		HP	0.509047	9.26326e-12
SAOUHSC_02727	SA2224		HP	0.474568	1.05249e-13
SAOUHSC_02760	SA2248		HP similar to ferredoxin-dependent glutamate synthase	0.549989	2.28871e-09
SAOUHSC_02761	SA2249		HP similar to integral membrane protein	0.543314	3.44637e-09
SAOUHSC_02775			HP	0.497809	1.06397e-06
SAOUHSC_02781	SA2268		HP	0.202469	< 1.0E-16
SAOUHSC_02810	SA2296		HP similar to MerR family transcriptional regulator	0.479185	1.43219e-13
SAOUHSC_02811	SA2297		HP	0.399661	< 1.0E-16
SAOUHSC_02816¥	SA2301		HP similar to alcaline phosphatase	0.493853	9.67004e-13
SAOUHSC_02830	SA2312	ddh	D-lactate dehydrogenase	0.164461	< 1.0E-16
SAOUHSC_02833	SA2315		HP similar to antibiotic transport system permease	0.505847	6.44751e-12
SAOUHSC_02842	SA2321		HP	0.295407	< 1.0E-16
SAOUHSC_02845	SA2324		HP similar to thioredoxin	0.492317	2.53753e-12
SAOUHSC_02861	SA2335		Putative methylated-DNA-protein-cysteine methyltransferase	0.410498	< 1.0E-16
SAOUHSC_02872	SA2343		HP	0.0286084	< 1.0E-16
SAOUHSC_02875	SA2346		Putative D-lactate dehydrogenase	0.390482	< 1.0E-16
SAOUHSC_02876	SA2347		HP similar to transaminase MtnE-like	0.399941	< 1.0E-16
SAOUHSC_02888	SA2357		HP	0.275387	< 1.0E-16
SAOUHSC_02910	SA2376		HP	0.471091	9.76996e-15
SAOUHSC_02923	SA2396		Putative basic amino acid APA family antiporter	0.305929	< 1.0E-16
SAOUHSC_02924	SA2397		Putative 4-aminobutyrate aminotransferase	0.243917	< 1.0E-16
SAOUHSC_03001	SA2458	icaR	ica operon transcriptional regulator IcaR	0.491042	5.58886e-13
SAOUHSC_03008	SA2465	hisF	Imidazole glycerol phosphate synthase subunit	0.544897	1.28053e-09
SAOUHSC_03009	SA2466	hisA	Phosphoribosylformimino-5-aminoimidazole carboxamide ribotide isomerase	0.385943	< 1.0E-16
SAOUHSC_03010	SA2467	hisH	Imidazole glycerol phosphate synthase subunit	0.482398	1.9762e-13
SAOUHSC_03021	SA2478		HP	0.516443	5.02389e-11
a Gene numbers SAOUHSC_ and SA correspond to S. aureus NCTC 8325 and N315 strain genomic sequence respectively (http://gib.genes.nig.ac.jp/single/main.php?spid=Saur_NCTC8325, http://genolist.pasteur.fr/AureoList/index.html).
* Genes known or predicted to be regulated by the WalKR system.
¥ Genes identified as GraSR regulon members (Table 2).
